# 1 Functional role of respiratory supercomplexes in mice: 2 segmentation of the $Q_{pool}$ and SCAF1

3 Enrique Calvo<sup>1†</sup>, Sara Cogliati<sup>1,2†</sup>, Pablo Hernansanz-Agustín<sup>1†</sup>, Marta Loureiro-  
4 López<sup>1†</sup>, Adela Guarás<sup>1</sup>, Rafael A. Casuso<sup>2</sup>, Fernando García-Marqués<sup>1</sup>, Rebeca Acín-  
5 Pérez<sup>1</sup>, Yolanda Martí-Mateos<sup>1</sup>, JC. Silla-Castro<sup>1</sup>, Marta Carro-Alvarellos<sup>1</sup>, Jesús R.  
6 Huertas<sup>2</sup>, Jesús Vázquez<sup>1,3\*</sup> and J.A. Enríquez<sup>1,4\*</sup>

7 <sup>1</sup> Centro Nacional de Investigaciones Cardiovasculares Carlos III. Madrid 28029, Spain.

8 <sup>2</sup>Institute of Nutrition and Food Technology, Biomedical Research Centre, Department  
9 of Physiology, University of Granada

10 <sup>3</sup> CIBERCV, Madrid, Spain

11 <sup>4</sup>CIBERFES, Madrid, Spain

12 \*Correspondence to: J. Vázquez ([jvazquez@cnic.es](mailto:jvazquez@cnic.es)) or J.A. Enríquez

13 ([jaenriquez@cnic.es](mailto:jaenriquez@cnic.es))

14 † these four authors contributed equally.

15

16

17

18

19

20

21

22

23

24

## 25 **Summary**

26 Mitochondrial respiratory complexes assemble into different forms of supercomplexes  
27 (SC). In particular, SC III<sub>2</sub>+IV require the SCAF1 protein. However, the structural role of this  
28 factor in the formation of the respirasome (I+III<sub>2</sub>+IV) and the physiological role of SCs are  
29 controversial. Here, we study C57BL/6J mice harbouring either non-functional SCAF1, the full  
30 knock-out for SCAF1 or the wild-type version of the protein and found a growth and exercise  
31 phenotype due to the lack of functional SCAF1. By combining quantitative data-independent  
32 proteomics, high resolution 2D Blue Native Gel Electrophoresis and functional analysis of  
33 enriched respirasome fractions, we show that SCAF1 confers structural attachment between III<sub>2</sub>  
34 and IV within the respirasome, increases NADH-dependent respiration and reduces ROS  
35 production. Furthermore, through the expression of AOX in cells and mice we confirm that CI-  
36 CIII superassembly segments the CoQ in two pools and modulates CI-NADH oxidative capacity.  
37 These data demonstrate that SC assembly, regulated by SCAF1, modulates the functionality of  
38 the electron transport chain.

## 39 **Introduction**

40 The mitochondrial cristae are the main site of biological energy conversion through the  
41 respiratory complexes I to V known as oxidative phosphorylation system (OXPHOS). Our  
42 understanding of the structure of the mitochondria electron transport chain was shaken in 2000  
43 by Herman Schägger when proposing that respiratory complexes could form superstructures  
44 called supercomplexes (SCs), among which the ones containing CI, CIII and CIV were named  
45 respirasomes (Schagger, 2000). This proposal came from a novel electrophoretic methodology  
46 mastered by that author named Blue Native Gel Electrophoresis (BNGE). First received with  
47 extreme skepticism, SCs are nowadays generally accepted as true biological entities. They are  
48 present in mitochondria from very different sources (Eubel et al., 2003; Schägger, 2002); they are  
49 able to respire (Acín-Pérez et al., 2008); specific factors for the formation of some SCs have been  
50 discovered (Lapiente-Brun et al., 2013); and the cryo-electron microscopy structures of the  
51 respirasome (I+III<sub>2</sub>+IV) and the supercomplex I+III<sub>2</sub> have been obtained (Gu et al., 2016; Letts

52 et al., 2016; Sousa et al., 2016). Although all these data demonstrate their existence, the  
53 physiological role of SCs is still under strong debate. A line of thinking proposes that SCs have  
54 no functional role (Milenkovic et al., 2017). Other authors indicate that SCs optimize electron  
55 flux to gain efficiency in energy generation while minimizing reactive oxygen species production  
56 (Lapiente-Brun et al., 2013; Lenaz and Genova, 2007; Maranzana et al., 2013). We proposed the  
57 “Plasticity Model”, where individual and super-assembled complexes coexist in a regulated  
58 equilibrium within the inner mitochondrial membrane (Acín-Pérez et al., 2008; Enríquez, 2016).  
59 Thus, SCs rearrange in response to a shift in the metabolic source of electrons (Guarás et al.,  
60 2016), in the metabolic adaptation of specialised cells in vivo (Garaude et al., 2016), or to adapt  
61 the cell to different nutrients and physiological conditions (Greggio et al., 2017; Lopez-Fabuel et  
62 al., 2016). For instance, under starvation the preferential use of fatty acids reduces the levels of  
63 SCs containing CI, so that free III<sub>2</sub> is more accessible to electrons coming from FADH<sub>2</sub>  
64 (Lapiente-Brun et al., 2013).

65         The controversy was centered in the biological role of SCAF1 in respirasomes and in the  
66 role of SCs in the functional segmentation of the CoQ pool. In mouse, SCAF1 is 113 amino acid  
67 long and has a high homology in its carboxy terminus with one subunit of CIV, for which there  
68 are two isoforms (COX7A1- 80 aa and COX7A2- 83 aa). The amino-terminal portion of the  
69 protein has no homology with any known protein. SCAF1 is required to super-assemble CIII and  
70 CIV by replacing COX7A2 in the structure of CIV and by binding CIII through its amino-terminal  
71 portion (Cogliati et al., 2016). Interestingly, all inbred mouse C57BL/6 sub-strains investigated  
72 to date (Enríquez, 2019), harbor a non-functional version of SCAF1 (named SCAF1<sup>111</sup>) that, due  
73 to a microdeletion that eliminate two amino acids, is unable to interact with CIV (Cogliati et al.,  
74 2016). In the absence of functional SCAF1, the SC III<sub>2</sub>+IV and the majority of SCs containing  
75 CI, CIII and CIV cannot be formed (Cogliati et al., 2016; Lapiente-Brun et al., 2013; Lobo-Jarne  
76 et al., 2018). However, in some instances, particularly in heart mitochondria from BL/6 mice, a  
77 comigration between CI, CIII and CIV suggestive of the presence of respirasomes can be observed  
78 (Cogliati et al., 2016; Lobo-Jarne et al., 2018). This raised doubts about the relevance of SCAF1  
79 for the formation and function of the respirasome (Lobo-Jarne et al., 2018). In addition, we

80 observed, confirming the previous suggestions (Bianchi et al., 2004), that superassembly partially  
81 segments CoQ in two pools, one predominantly dedicated to FAD and another to NAD(Lapunte-  
82 Brun et al., 2013). Noteworthy, these data were obtained using isolated mitochondria. Elsewhere,  
83 but using sub-mitochondrial particles, opposite conclusions were reported (Fedor and Hirst,  
84 2018), calling the partial CoQ partitioning hypothesis into question.

85 In this work we demonstrate that the ablation of SCAF1 decreases the performance of  
86 mice under rigorous metabolic stresses such as reduced food supply or intense exercise demand.  
87 In addition, by combining data-independent proteomics, 2D BNGE-based structural analysis and  
88 functional studies of the BNGE enriched respirasome fractions, we demonstrate that SCAF1 plays  
89 a key role in the regulation of the structure of respirasome and its bioenergetics performance. In  
90 addition, through the expression of AOX in several cell systems and animals, we have been able  
91 to confirm the segmentation of the CoQ in two pools is a consequence of the superassembly  
92 between CI and CIII. These findings demonstrate that SCs play a physiological role and provide  
93 a molecular mechanism for the phenotype observed in animals.

## 94 **Results**

### 95 **The ablation of functional SCAF1 compromises growth under food restriction and impairs** 96 **exercise performance.**

97 One of the more recurrent arguments to challenge the proposal that SCAF1 and the  
98 superassembly between complexes III and IV are bioenergetically relevant is the belief that all  
99 C57BL/6 mice sub-strains, which harbor a non-functional SCAF1, lack an apparent phenotype.  
100 Since this belief has never been experimentally addressed, we first investigated it in detail. We  
101 compared the phenotype of C57BL/6 mice with full ablation of SCAF1 (SCAF1<sup>-/-</sup> or SCAF1<sup>KO</sup>),  
102 with the non-functional version of SCAF1 (SCAF1<sup>111/111</sup>), and with the wild-type and functional  
103 version of this gene in homozygosis (SCAF1<sup>113/113</sup>). We first confirmed that SCAF1<sup>113/113</sup> liver  
104 and heart mitochondria express high levels of SCAF1 that are associated substantially with the  
105 respirasome and SC: III<sub>2</sub>+IV (Fig. 1A). On the other hand, and as described before (Cogliati et  
106 al., 2016), SCAF1<sup>111</sup> was very unstable and could only be found in minor amounts, interacting  
107 with CIII either in the I+III<sub>2</sub> or in III<sub>2</sub> (Fig. 1A). In the full KO mice, no SCAF1 could be detected

108 (Fig. 1A). Work from our group revealed that the ablation of SCAF1 in zebrafish affects the  
109 growth of male and female animals, the female fertility and the swimming performance of  
110 otherwise healthy animals. We also showed that all these phenotypic features disappear when  
111 overfeeding the animals (García-Poyatos et al., 2019). Therefore, we hypothesized that since in  
112 the usual food regime of mouse facilities animals are fed ad-libitum, a situation that can be  
113 considered overfeeding, C57BL/6 mice would be protected against similar manifestations of the  
114 lack of functional SCAF1. Therefore, we first evaluated if the presence of functional SCAF1 in  
115 mice had any physiological impact under restricted food administration. Animals were feed ad  
116 libitum for 24 hours every three days and were fasted during the rest of the time (Fig. 1B). During  
117 the first days the animals suffered a period of adaptation in which SCAF1<sup>113</sup> males were able to  
118 maintain or even increase their weight, whereas SCAF1<sup>111</sup> and KO males showed the opposite  
119 trend (Fig. 1C). This period also resulted in the loss of some mice, without significant differences  
120 between strains but with a clearly better survival rate of females vs. males (Fig. S1A). Once  
121 adapted, all animals started gaining weight. These results indicate that the absence of SCAF1<sup>113</sup>  
122 affects mice physiology and that SCAF1<sup>111</sup> does not retain any significant functionality (Fig. 1C).  
123 Interestingly, females were insensitive to the presence of functional SCAF1 (Fig. 1C), probably  
124 due to a different female mechanism of adaptation to fasting (Della Torre et al., 2018). Next, we  
125 evaluated the impact of functional SCAF1 on exercise performance. Thus, we found that both  
126 male and female SCAF1<sup>113</sup> were able to reach a 30% higher maximum speed in the treadmill than  
127 any other group of animals (Fig. 1D). These studies demonstrate that the presence of functional  
128 SCAF1 has a direct impact on the mice phenotype, implying that supercomplex formation allows  
129 a more efficient electron transport chain. This increased efficiency allows males to better extract  
130 energy from aliments, and both sexes to respond to higher muscle work demands. The observation  
131 that SCAF1 ablation causes such evident phenotype demands a deeper look into the molecular  
132 role of this protein in the function of the mitochondrial electron transport chain, which could help  
133 to solve the controversy on this issue. To that aim, we combined unbiased complexome analysis  
134 by mass spectrometry, 2D-BNGE evaluation of the interaction of respiratory complexes within

135 supercomplexes, and functional analysis of enriched fractions of complexes and supercomplexes  
136 in the presence or in the absence of functional SCAF1.

137 **The size distribution of OXPHOS components is tissue-specific as a consequence of**  
138 **superassembly**

139 First, we applied Blue-DiS, a recently developed technology that takes advantage of the  
140 reproducibility and sensitivity of data-independent mass spectrometry (Guarás et al., 2016), to  
141 perform mitochondrial complexome profiling from a completely hypothesis-free perspective.  
142 Thus, mitochondria-enriched preparations from heart, brain and liver from CD1 mice and from  
143 the cell line L929 repopulated with mtDNA from C57BL/6 mice (L929<sup>C57</sup>), having all of them the  
144 wild type functional version of SCAF1, were separated by BNGE and each lane was cut into 26  
145 slices; each slice was subjected to trypsin protein digestion and analyzed by MS using the DiS  
146 method we previously developed (Guarás et al., 2016). We identified 1,134 proteins classified as  
147 mitochondrial in the Mitocarta 2.0 (Calvo et al., 2016), which correspond to 98% of all Mitocarta  
148 annotated proteins (Fig. S1B). Mitochondrial enrichment was different between samples, being  
149 heart (81% of peptide identifications annotated in Mitocarta) and liver (71%) more enriched in  
150 known mitochondrial proteins; while brain showed a lower enrichment (38%) (Fig. S1C). In all  
151 cases an almost complete coverage of components of OXPHOS complexes was achieved (Dataset  
152 1). Every subunit from CII and CIII was identified (Fig. S1D), together with 41 out of the 44  
153 annotated proteins from CI (Fig. S1D). Concerning CIV, this complex is built out of 14 proteins  
154 but several of them have isoforms making up a total of 21 possible components. However,  
155 COX6B2 and COX7B2 are both expressed only in sperm, and COX4i2 only in lung, so that 18  
156 proteins were potentially identifiable in our samples, from which we detected 16 (Fig. S1D).  
157 Regarding CV, we could detect 17 out of the 20 structural proteins of this complex (Fig. S1D).  
158 Apparent molecular weights could be accurately assigned to each one of the 26 BNGE slices from  
159 the known masses of individual complexes and of SC (Fig. S1E).

160 We performed a cross-correlation analysis of protein abundances across different slices  
161 within the same mitochondrial type (Fig. S2A). This analysis showed that the relative abundances  
162 of all proteins belonging to either CI, CIII, CIV or CV were constant across slices (Fig. S2A &

163 [Supplementary Table 1](#)), and that the most representative slice from each complex also had the  
164 same protein proportions across the different mitochondrial types ([Fig. S2B & Supplementary](#)  
165 [Table 2](#)). In striking contrast, the electrophoretic mobility protein distributions of CI, CIII and  
166 CIV, but not of CV, were markedly different from one mitochondrial source to another ([Fig. S2C,](#)  
167 [D](#)). Thus, complexes in different tissues have the same protein composition but form tissue-  
168 specific high molecular weight structures.

169 Notably, the larger structures (slides 1-8) consistently contained identical proportions of  
170 CI and CIII, or CIII and CIV proteins ([Fig. 2A, B](#)). Cross correlation analysis confirmed that the  
171 protein composition in the I+III+IV, I+III and III+IV structures was maintained between the  
172 adjacent slices ([Fig. 2C](#)) and between tissues ([Fig. 2D](#)), reflecting the formation of SC in an  
173 unbiased manner. To obtain a quantitative estimate of the distribution of these structures in each  
174 tissue we modelled the complete migration profiles of CI, CIII and CIV by unsupervised gaussian  
175 deconvolution. We found that in all mitochondrial types the profile of CI and CIII could be  
176 accurately explained as a superimposition of broad gaussian peaks corresponding to a ternary  
177 complex (I+III+IV), to binary I+III and III+IV structures and to free CI, CIII and CIV forms  
178 ([dashed red lines in Fig. 2E and Fig. S2D](#)), having these components the same electrophoretic  
179 mobilities and similar peak widths across all mitochondrial sources ([Fig. 2F](#)). We also found that  
180 the profile of CIV could not be adequately explained by these structures around slices 6-12 ([Fig.](#)  
181 [2E, black arrows](#)), suggesting the presence of significant amounts of CIV dimers and multimers.  
182 Thus, the addition of two more CIV structures ( $IV_2$  and  $IV_m$ ) was sufficient to model the migration  
183 profile of this complex in all mitochondrial types ([dashed red lines in Fig. 2E and Fig. S2D](#)).

184 To further validate the predicted structures of OXPHOS molecular assemblies, we  
185 performed a Blue-DiS analysis of mitochondria from cultured mutant cell lines that are unable to  
186 assemble one or more of the complexes (Diaz et al., 2006; Moreno-Loshuertos et al., 2006;  
187 Perales-Clemente et al., 2010). In the cell line  $\Delta CI$ , which lacked the ND4 subunit from CI and  
188 was unable to assemble CI (Moreno-Loshuertos et al., 2006), neither free CI nor SCs I+III<sub>2</sub> and  
189 I+III<sub>2</sub>+IV could be detected ([Fig. S3A, B](#)); however, free III<sub>2</sub> and IV and the SC III<sub>2</sub>+IV were  
190 detected at the expected sizes (green rectangles). In the case of the mutant cell line for Cox10

191 protein ( $\Delta$ CIV), which lacks assembled CIV, all structures containing CIV were absent (red  
192 rectangles in Fig. S3A, B). In addition, the structures containing CI could neither be detected, in  
193 agreement with the fact that CIV is needed for the stabilization of CI (Diaz et al., 2006); hence in  
194 this mutant only the free III<sub>2</sub> form was detectable (green rectangles in Fig. S3A, B). Finally, in  
195 the Rho 0 cell line, which lacks mitochondrial DNA encoding for different subunits of the  
196 respiratory complexes, none of these structures were observed (red rectangles in Fig. S3A).  
197 However, CII, which is totally encoded in the nucleus, and a CV form of smaller size (V\*)  
198 remained detectable in these cells (Fig. S3A).

199 In summary, the complete size distributions of OXPHOS components could be explained  
200 by structures of constant size and composition that were present in each mitochondrial type at  
201 different relative proportions (Fig. 2F).

## 202 **Respiratory complexes are assembled into supercomplexes at fixed stoichiometries.**

203 The notion that SC contained complexes at fixed stoichiometries was reinforced by the  
204 finding that the protein composition of SC was conserved in all mitochondrial types (Fig. 2D).  
205 We took advantage of the good linear response of quantitative Blue-DiS protein values (Fig. 2A,  
206 B; Fig. S2A) to estimate the relative molar stoichiometries of complexes within each slice (Fig.  
207 S3C, D, see M&M for detailed explanation). From slices 2 to 6 the relative molar proportion  
208 CIII:CI was 2:1, in the four mitochondrial types, implying that the proportion I+III<sub>2</sub> is constant in  
209 the respirasome and in the SC formed by CI and CIII (Fig. S3E). Besides, the relative molar  
210 proportions CI:CIV and CIII:CIV were 1:1 and 2:1, respectively, between slices 2 to 4, implying  
211 that the respirasome has a composition I+III<sub>2</sub>+IV (Fig. S3E).

212 To our knowledge, these are the first stoichiometry estimations of OXPHOS complexes  
213 made by mass spectrometry, which agree with the structures analysed by cryo-electron  
214 microscopy (Gu et al., 2016; Letts et al., 2016; Sousa et al., 2016), and contradict the  
215 experimentally unsupported, but generalized tendency to assume that there are multiple types of  
216 respirasomes that differed in their increasing content of 1-4 CIV monomers. The reason for the  
217 split of the respirasome in several discrete bands in BNAGE, corresponding to a broad peak in  
218 Blue-Dis analysis, remains to be clarified. In slices 5 and 6, CIV is still detected although at a



219 lower proportion, suggesting that in this area migrate CIV superstructures of unknown  
220 composition (Fig. 3E). Slices 7 and 8 are enriched in CI, where it migrates as a free complex, but  
221 again with significant presence of CIV in different high molecular weight structures. Finally, the  
222 relative proportions of CIII and CIV in bands 9 and 10 are coherent with a stoichiometry 2:1 (SC:  
223 III<sub>2</sub>+IV) (Fig. 3E). In summary, unbiased Blue-DiS analysis reinforces the results obtained by  
224 other techniques and provide complementary evidence that OXPHOS complexes are arranged  
225 into SC at fixed stoichiometries.

### 226 **CIV forms novel supercomplexes**

227 Our complexome analysis predicts that several structures that contain CIV, not yet  
228 molecularly characterized, should be present. These are CIV structures above and below SC:  
229 III<sub>2</sub>+IV but also some CIV structures of higher molecular weight migration around I+III<sub>2</sub> and  
230 I+III<sub>2</sub>+IV. The existence IV<sub>2</sub> is well documented, and high molecular weight entities containing  
231 only CIV have been described elsewhere (Cogliati et al., 2016). To confirm whether the CIV  
232 structures predicted by Blue-DiS analysis are true entities, we performed 2D-BNGE of CD1 heart  
233 mitochondria using in the first dimension digitonin as detergent to preserve the integrity of  
234 supercomplexes and n-Dodecyl-β-D-maltoside (DDM) in the second dimension to disaggregate  
235 supercomplexes into their component complexes. This procedure partially preserves the  
236 interaction between CIII and CIV and the IV<sub>2</sub> (Perales-Clemente et al., 2010). As shown in Fig.  
237 3A this analysis confirmed the presence of IV<sub>2</sub> and two forms of CIV that migrate immediately  
238 faster and slower than SC III<sub>2</sub>+IV and that do not super-assemble with any other respiratory  
239 complex (IV<sub>m</sub> and IV<sub>n</sub> in Fig. 3A). These three structures account for a significant proportion of  
240 the CIV in heart samples. In addition, we detected the presence of low proportions of a putative  
241 SC: I+IV<sub>2</sub>, which migrates with SC I+III<sub>2</sub> and segregates into CI and dimer CIV (Fig. S3F), and  
242 of a putative SC I+IV, which migrates between free CI and SC: I+III<sub>2</sub> (Fig. S3F).

243 More surprisingly, we found CI and CIV monomer but without CIII that migrate between  
244 SC: I+III<sub>2</sub>+IV and SC I+III<sub>2</sub>, very close to the faster migrating respirasome band I+III<sub>2</sub>+IV (Fig.  
245 S3F, labelled as I+IV?). The reason why this putative SC migrates with the apparent molecular  
246 weight of a respirasome is unclear and may indicate that this structure interacts with a yet to

247 discover mitochondrial inner membrane component. Therefore, 2D-BNGE analysis of heart  
248 mitochondria reveals specific supercomplexes that contain CIV, confirming Blue-DiS  
249 predictions, and also CIV and CI together and that need to be further investigated. Note that, due  
250 to their relatively low abundances, these additional IV structures are fully compatible with the  
251 gaussian models of CI and CIV determined from Blue-DiS profiles.

### 252 **SCAF1 confers structural attachment between III<sub>2</sub> and IV within the respirasome**

253 To identify potential interaction partners of specific SC structures from the Blue-DiS  
254 analysis, we generated their reference migration profiles *in silico* by combining the SC profiles  
255 obtained by deconvolution analysis and performing a correlation search for all identified proteins  
256 displaying a similar profile. This analysis led to a natural, hypothesis-free detection of  
257 Cox7a21/SCAF1 as the only candidate showing a significant correlation in all the mitochondrial  
258 types with the structures containing CIII and CIV together (ED Fig. 4a left & b). Consistently,  
259 deletion of CI inhibited the migration of SCAF1 in the position of the respirasome, but not in the  
260 position of SC III<sub>2</sub>+IV, and no traces of SCAF1 were detected in the mutant lacking CIV or in  
261 Rho 0 cells (Fig. S4A right). These results obtained by unbiased complexome analysis provide  
262 further experimental evidence that this protein regulates the interaction between these complexes,  
263 as we postulate in previous reports (Cogliati et al., 2016; Lapuente-Brun et al., 2013).

264 Next, we analyzed by gaussian deconvolution the Blue-DiS profiles of mitochondria  
265 prepared from SCAF1<sup>111</sup> heart and liver C57BL/6JOLA<sup>Hsd</sup> mitochondria. As shown in Fig. 3B, in  
266 BL6 liver the peaks corresponding to the respirasome and the SCs III<sub>2</sub>+IV disappeared, while the  
267 rest of structures, including SCs I+III<sub>2</sub> and the III<sub>2</sub> peaks, were maintained. However, while SC  
268 III<sub>2</sub>+IV was neither observed in BL6 heart, the presence of the respirasome remained clearly  
269 detectable in this tissue (Fig. 3B). Therefore, BL6 and CD1 respirasomes are present in heart  
270 mitochondria, but differ in the absence of SCAF1 in the former.

271 We reasoned that if the role of SCAF1 is to physically link CIII and CIV, and this function  
272 is maintained in the respirasome, then mitochondria harboring SCAF1<sup>113</sup> and SCAF1<sup>111</sup> should  
273 have different types of respirasomes differing structurally in the interaction between CIII and  
274 CIV. To experimentally evaluate this hypothesis, we took advantage of the fact that upon 2D-

275 BNGE analysis the second dimension used to disaggregate supercomplexes (which employs  
276 DDM) does retain significant amounts of the III<sub>2</sub>+IV association, allowing us to discern whether  
277 CIII and CIV are physically linked or not in the respirasome in the absence of functional SCAF1.  
278 We performed 2D-BNGE with liver mitochondria derived from CD1, C57BL/6JolaHsd mice and  
279 also from C57BL/6JolaHsd harboring the wild type version of SCAF1 (SCAF1<sup>113</sup>) generated in  
280 our laboratory (Cogliati et al., 2016). This approach confirmed again that heart mitochondria from  
281 BL6 mice does not assemble SC III<sub>2</sub>+IV (Fig. 3C) and clearly demonstrated that the III<sub>2</sub>+IV  
282 structure remains within the respirasomes containing functional SCAF1 (CD1 and SCAF1<sup>113</sup>) but  
283 not in those with the non-functional form (BL6<sup>111</sup>) (Fig. 3C). In conclusion, this analysis  
284 demonstrates that SCAF1<sup>+</sup> and SCAF1<sup>-</sup> respirasomes are structurally different (Fig. 3D).

### 285 **SCAF1 enhances respiratory performance and reduce ROS production by the respirasome.**

286 We then inquired if the structural difference linked to the presence of an active SCAF1  
287 form in the respirasome has any impact on their respiratory capacity. We first evaluated the  
288 suitability to perform these kinetic analyses by confirming in isolated individual complexes (I,  
289 III<sub>2</sub> and IV) that it is possible to measure the rate of oxidation and reduction of their respective  
290 donor/acceptor of electrons and that they generate the expected stoichiometries. All the rates of  
291 the individual complexes were similar regardless the strain of origin, with the exception of a mild  
292 reduction in CIII activity in BL6<sup>113</sup> (Fig. S4C-E). Next, we excised BNGE bands containing SC  
293 I+III<sub>2</sub>+IV (respirasome) from SCAF1<sup>113</sup> (CD1, BL6<sup>113</sup> and 129 mice) and SCAF1<sup>111</sup> (C57BL/6J  
294 mice) heart mitochondria and determined their respiratory capacity using NADH as substrate in  
295 a Clark electrode (Acín-Pérez et al., 2008) and their NADH oxidation capacity by  
296 spectrophotometry (Fig. 4A). For normalization purposes we determined the respiration capacity  
297 induced by TMPD in the same samples after inhibition with antimycin and rotenone; we also  
298 normalized by the protein content determined after eluting the respirasome from the gel. We found  
299 that both SCAF1<sup>+</sup> and SCAF1<sup>-</sup>-containing respirasomes were able to perform NADH-dependent  
300 respiration without the need of adding either external CoQ or Cyt c (Fig. 4B). Interestingly, the  
301 respiratory capacity of the respirasome was much lower than that of CIV-monomer and NADH  
302 oxidation was also decreased in comparison to that of CI. These results suggest, in agreement

303 with a recent observation on amphipol-stabilized SC:I+III<sub>2</sub>, that superassembly of respiratory  
304 complexes modulate their activity (Letts et al., 2019). Moreover, the rate of respiration by  
305 SCAF1<sup>+</sup> respirasomes of different sources was about one order of magnitude higher than that of  
306 the SCAF1<sup>-</sup> ones regardless of whether they are normalized by CIV-dependent respiration (Fig.  
307 4C) or by protein content (Fig. 4D). In agreement with this observation, the rate of NADH  
308 oxidization by SCAF1<sup>+</sup> respirasomes was between 3 and 4 times higher (Fig. 4E).

309 Lenaz's laboratory showed by reconstruction in liposomes that the association between  
310 CI and CIII into SCs reduces the production of ROS (Maranzana et al., 2013). This observation  
311 was validated in vivo by others (Lopez-Fabuel et al., 2016)(Huertas et al., 2017). The availability  
312 of respirasomes with different degree of interaction between III<sub>2</sub> and IV allowed us to investigate  
313 whether this interaction impacts on the production of ROS. For this purpose, we incubated the  
314 BNGE-excised respirasome bands from CD1, BL6<sup>S111</sup> and BL6<sup>S113</sup> heart mitochondria  
315 preparations in the presence of NADH and Amplex-red to monitor ROS production. We found  
316 no differences in the level of ROS produced by the respirasomes from any of the investigated  
317 strains (Fig. 4F, G). Considering that the rate of respiration and NADH oxidation of SCAF1<sup>111</sup>  
318 respirasome is lower than its wild type counterpart, we calculated that the respirasome harbouring  
319 the mutant version of SCAF1 derived 0,185% of NADH electrons to ROS, whereas CD1 and  
320 SCAF1<sup>113</sup> derived 0,064 % and 0,067%, respectively. Next, we repeated the experiment but  
321 substituting NADH by CoQ<sub>1</sub>H<sub>2</sub> to donate electrons to CIII and in the presence of rotenone to  
322 block CI interaction with CoQ. Under these conditions, which mimic a stress situation with an  
323 abnormal rise in CoQH<sub>2</sub>, SCAF1<sup>-</sup> respirasomes produced significantly more ROS (Fig. 4F, G). In  
324 all cases, ROS production was fully quenchable by the addition of superoxide dismutase and  
325 catalase (Fig. 4F, G). Therefore, SCAF1<sup>+</sup> respirasomes produced less ROS than SCAF1<sup>-</sup> ones.

326 In summary, although SCAF1 can be dispensable for the formation of respirasomes it  
327 confers structural attachment between complexes III<sub>2</sub> and IV within the respirasomes providing  
328 more stability, significantly better functional performance and lower ROS production.

329 **Respiratory supercomplexes are unstable upon mitochondrial membrane disruption.**

330 The existence of two structurally distinct respirasomes was described recently in  
331 ovine(Letts et al., 2016) and confirmed later in bovine models (Sousa et al., 2016). One form of  
332 respirasome has complexes III<sub>2</sub> and IV tightly attached (named *tight respirasome*), while the other  
333 is characterized by an increased distance between them (named *loose respirasome*). Our  
334 observation that SCAF1 determines the interaction between III<sub>2</sub> and IV within the respirasome is  
335 reminiscent of the existence of tight and loose respirasomes. Noticeably, both ovine and bovine  
336 SCAF1 sequences match the mouse wild-type and functional 113 version.

337 Very intriguingly, Letts and co-workers observed that the proportion between both  
338 respirasome forms in a given preparation is not stable. In fact, after incubation at 4° C the tight  
339 respirasomes were transformed into the loose ones (Letts et al., 2016). We wondered whether this  
340 phenomenon could be observed by BNGE analysis. Thus, we compared CD1-liver mitochondria  
341 (which harbors the functional SCAF1 form), maintained several hours in the refrigerator, before  
342 and after solubilization with digitonin. To our surprise, both SCs I+III<sub>2</sub>+IV and III<sub>2</sub>+IV, but not  
343 SC I+III<sub>2</sub>, disappeared in the samples maintained at 4 °C only if they were previously digitonized  
344 (Fig. 5A). In addition, SCAF1 migrated as a bulk with the free CIV in the digitonized preparations  
345 (Fig. 5A, B). Furthermore, 2D-BNGE/SDS-PAGE analysis revealed that the form of SCAF1 that  
346 migrated with free CIV (marked with an asterisk) had a smaller molecular weight than the  
347 canonical form (Fig. 5C). Proteomic analysis demonstrated that in slices corresponding to SC  
348 I+III<sub>2</sub>+IV, IV<sub>2</sub> and IV, a peptide spanning the sequence SSVTAYDYSYGK (originated from the  
349 corresponding SCAF1-derived tryptic peptide LTSSVTAYDYSYGK) was unequivocally  
350 identified exclusively in the non-fresh samples (Fig. 5E and Fig. S5A). This sequence was mapped  
351 into the N-terminus region of the protein, which contains the CIII-interacting domain(Cogliati et  
352 al., 2016) (underlined sequence in Fig. 5D). Further quantitative analysis revealed the coexistence  
353 of the intact and proteolyzed forms of the peptide bound to CIV in the respirasome, while SC:  
354 III<sub>2</sub>+IV contained only the intact form (Fig. 5E). These results indicate that SCAF1 suffers a  
355 partial proteolytic processing that disrupts SC: III<sub>2</sub>+IV, destabilizes the respirasome and parallels  
356 the loss of CIV-containing SCs. In silico analysis of the processing site in SCAF1 revealed a  
357 putative cleavage site for calpain-1 (Fig. 5D). In agreement with this prediction the use of calpain

358 inhibitors was sufficient to prevent the cleavage of SCAF1 (Fig. 5F) and also to preserve the  
359 integrity of CIV-containing SC after digitonin treatment (Fig. 5G). When similar experiments  
360 were repeated with mitochondrial samples purified from CD1-heart we also observed the  
361 relocation of SCAF1 with free CIV, but the reduction in the amount of CIV-containing SC was,  
362 although evident, much milder (Fig. 5H). All these results indicate that SC are unstable or can  
363 shift from tight (e.g. kinetically active) to loose (e.g. kinetically restrained) forms when  
364 mitochondrial membrane integrity is compromised, likely as a consequence of the release of  
365 proteases, such as calpain-1, and lipases that gain access to the inner mitochondrial membrane  
366 and to the respiratory complexes.

367         It remains to be elucidated whether SCAF1 processing by calpain-1 is just an in vitro  
368 artifact or a biologically relevant mechanism regulating SCs turnover dynamics. However, the  
369 observation that respiratory complexes become unstable when the mitochondrial membrane  
370 integrity is disrupted, raises serious concerns on the interpretation of the various published  
371 experimental approaches used to investigate the function of the SCs. They include sub-  
372 mitochondrial particles, where functional measurements were performed at 32 °C (Blaza et al.,  
373 2014; Fedor and Hirst, 2018); isolated mitochondria, which were incubated at 37 °C (Guarás et  
374 al., 2016; Lapuente-Brun et al., 2013); and partially isolated respirasomes (this report). To further  
375 study this issue, we subjected digitonized and intact mitochondria from liver (Fig. S5B) and heart  
376 (Fig. S5C) preparations to prolonged incubations at different temperatures. Liver digitonized  
377 mitochondria completely lost the respirasome and the SC III<sub>2</sub>+IV, after 72 hours at 4 °C, and all  
378 SCs, including I+III<sub>2</sub> after 3h at 37 °C (Fig. 5A and Fig. S5B). Respirasomes from heart  
379 digitonized mitochondria were more stable than those from liver at 4 °C (72h) but were completely  
380 lost after 3h at 37 °C; at this temperature the SC III<sub>2</sub>+IV and even the CIV monomer disappeared  
381 (Fig. S5C). In contrast, all of these structures remained stable in intact organelles (Fig. S5B, C).  
382 More worrying is the fact that the stability of both heart and liver SCs is not maintained if  
383 digitonized mitochondria are incubated at 37 °C for just one hour (Fig. S5D). All these  
384 observations call to caution when performing experiments in disrupted mitochondria. Very  
385 importantly, the differential stability of SC in intact and broken mitochondria may well be the

386 cause of the apparently discrepant results regarding the physiological role of respiratory  
387 supercomplexes between different groups.

388 Our unexpected results prompted us to evaluate if BNGE purified respirasomes were  
389 stable enough during functional studies to trust the conclusions presented above. To address this  
390 issue, we kept the first-dimension gel for 1 or 3 hours at 37°C after running the BNGE to inquire  
391 if the respirasomes are preserved. After the incubation period we ran a second-dimension  
392 electrophoresis also in the presence of digitonin to determine the intactness of structures, since  
393 complexes and SCs are expected to migrate forming a diagonal unless some associations are  
394 disrupted during incubation. Thus, after 1- or 3-hour incubation at 37 °C the respirasome and any  
395 other detected complex or SCs remained substantially intact apart from comet tail-like shape of  
396 the spots due to diffusion in the 1<sup>st</sup> dimension gel during the long period of incubation (Fig. S5E).  
397 Moreover, 2D-BNGE analysis, using DDM in the second dimension to dissociate the  
398 respirasomes, confirmed the stability of the interaction between III<sub>2</sub> and IV within the respirasome  
399 (Fig. S5F). Therefore, BNGE allows the isolation of the respirasome maintaining its structure to  
400 perform functional studies, validating our functional observations.

401 **Superassembly of OXPHOS complexes influences the delivery of electrons and the**  
402 **respiratory capacity within the electron transport chain.**

403 The lack of stability of the respiratory supercomplexes upon disruption of mitochondrial  
404 membranes raises serious concerns on the interpretation of recent experiments where recombinant  
405 AOX was added to a preparation of sub-mitochondrial particles (Fedor and Hirst, 2018). The data  
406 obtained suggested that the interaction of CI and CIII in supercomplexes does not modify the  
407 delivery of electrons to the alternative oxidase AOX by CoQ. These results led to the conclusion  
408 that there is a unique CoQ pool equally accessible to CI and CII within mitochondrial inner  
409 membrane. Given the observation that the native structure of supercomplexes is preserved in  
410 intact mitochondria, we performed similar experiments but expressing AOX in the mitochondria  
411 of different cell models: a) wild-type cells expressing AOX (CIV<sup>WT</sup>AOX and E9AOX); b) cells  
412 lacking CIV which retain CI and SCI+III<sub>2</sub> superassembly due to the presence of AOX  
413 (CIV<sup>KO</sup>AOX); c) cells that lack CIII which preserve CI due to AOX expression but CI cannot

414 form supercomplexes with CIII (CIII<sup>KO</sup>AOX). AOX expressed in mammalian mitochondria is  
415 known to be functional and can recycle oxidized CoQ in cells lacking of mtDNA (Perales-  
416 Clemente et al., 2008) or in cells lacking CIII or CIV (Guarás et al., 2016). We described  
417 elsewhere that the expression of AOX prevent the degradation of CI in the absence of CIII or CIV  
418 (Guarás et al., 2016) (Fig. S6A). We found that the level of AOX activity was similar between  
419 the different cell lines (Fig. S6B). Following similar reasoning to that of Fan & Hirst, the delivery  
420 of electrons from CI or CII to AOX should be independent of superassembly in the absence of  
421 CIII. However, if the superassembly between CI and CIII has any effect on the activity of CI, in  
422 the absence of CIV a change in the delivery of electrons from CI to AOX should be detected (Fig.  
423 6A). In the two mutant cells we detected measurable CI-AOX and CII-AOX respirations, while  
424 CIV-dependent respiration could not be recorded (Fig. 6B). Strikingly, CII-AOX dependent  
425 respiration was insensitive to the presence of CIII, while CI-AOX dependent respiration was  
426 significantly lower when CIII is present (Fig. 6B). This is true despite a higher NADH oxidation  
427 capacity of CI in CIV<sup>KO</sup>AOX cells (Fig. 6C). We also reasoned that if a CoQ pool was shared  
428 between CII and CI, addition of succinate would outcompete with glutamate + malate-based AOX  
429 respiration (Fig. 6D). We found that in either the wild type or in the CIV<sup>KO</sup> cells, all expressing  
430 AOX, the addition of succinate significantly increased the oxygen consumption over that  
431 achieved by CI substrates (Fig. S6C, D and Fig. 6E). On the contrary, in CIII<sup>KO</sup> AOX cells the  
432 addition of succinate was unable to increase the AOX dependent oxygen consumption over that  
433 reached by CI substrates (Fig.S6D and Fig. 6E). These results suggest that when CI is not  
434 superassembled CoQ exist in a unique pool, whereas its superassembly triggers the formation of  
435 two partially differentiated pools.

436 We then measured directly NADH or succinate dependent respiration (Fig. 6F, G) and  
437 NADH oxidation (Fig. 6H) in mitochondrial membranes permeabilized by freeze & thawing in a  
438 period of 4 min to prevent disruption of supercomplexes, and isolating mitochondria from wild  
439 type, CIV<sup>KO</sup> and CIII<sup>KO</sup> cell models, all expressing AOX. This analysis offered a number of  
440 interesting observations: (i) In the presence of CIII none of the substrates (NADH or succinate)  
441 was able to reach the oxygen consumption levels obtained when both substrates were added



442 simultaneously (Fig 6F, G). This indicates that the delivery pathway of electrons to CoQ and  
443 AOX is partially different for each substrate. (ii) NADH oxidation of the two wild-type cells lines  
444 is different, being the E9 nuclear background significantly lower ( $\approx 50\%$ ) (Fig. 6H). We described  
445 elsewhere that this is due to the presence of a missense mutation in COI that reduce the activity  
446 of CIV, and hence, respiration (Acin-Perez, 2003), a fact that can also be observed in ED Fig.5C  
447 and D. (iii) The addition of succinate did not impact on the oxidation of NADH in any wild type  
448 cell line while the inhibition of CIV by KCN almost completely abolished it in wild type cells  
449 (Fig. 6H). (iv) The ablation of CIV dramatically reduced the rate of oxidation of NADH to levels  
450 equivalent to those caused by KCN (Fig. 6H). (iv) The ablation of CIII significantly increased the  
451 NADH oxidation with respect to the levels of their isogenic wild type cells -which harbor a  
452 mutation in COI- (Fig. 6H). This result parallels what we have observed measuring oxygen  
453 consumption in intact mitochondria (Fig. S6D), and fully confirms that the dependence of CIV  
454 activity limits the NADH oxidation capacity in E9 derived cells. (v) In the absence of CIII but not  
455 of CIV, the addition of succinate significantly reduced the NADH oxidation, which in these cells  
456 is fully dependent of AOX (Fig. 6H). All these results demonstrate that the superassembly of CI  
457 with CIII, either in SCs or in the respirasome, impacts dramatically in the NADH oxidation  
458 capacity of CI by modifying the delivery of electrons to CIV or AOX. Moreover, they indicate  
459 that CI and CII can potentially outcompete for delivering electrons to AOX, a phenomenon that  
460 is minimized by the presence of CIII. Our results with AOX expression substantially disagree  
461 with those published by Fedor and Hirst (Fedor and Hirst, 2018). The reason for this discrepancy  
462 is likely due to the unnoticed disruption of the supercomplexes under their experimental set up,  
463 as explained above.

464         There are, however, additional experimental differences between our analyses that may  
465 contribute to those discrepancies. Fedor et al. utilized mitochondria extracted from hearts as  
466 starting material for their experiments (Fedor and Hirst, 2018). In order to minimize the impact  
467 of the mitochondrial source, we generated a novel mouse model expressing AOX in the heart and  
468 muscle mitochondria (see material and methods for details) and repeated the experiments with  
469 purified wild type muscle and heart mitochondria expressing AOX. We first performed the

470 analysis of respiration in intact mitochondria fed with CI substrates (Glut+Mal) and assessing the  
471 distribution of electrons either to CIV or AOX by using specific inhibitors for each enzyme (Fig.  
472 6I, left panel). As expected, more than 70% of CI-dependent respiration was sensitive to CIV  
473 inhibition, with a significant respiration mediated by AOX (Fig. 6I, left panel). We confirmed  
474 that this assay was specific for CI by monitoring NADH oxidation in intact mitochondria by  
475 measuring changes in NADH auto-fluorescence during the assay in the absence or in the presence  
476 of rotenone (Fig. 6I, right panel). We additionally performed experiments in freeze-thawed  
477 mitochondria prepared from hearts expressing AOX and confirmed again that NADH-linked  
478 respiration was completely inhibited by KCN, whereas CII-AOX respiration was maintained (Fig.  
479 S6E). Monitoring NADH absorbance allowed us to confirm that KCN completely abolished  
480 NADH oxidation, in contrast to SHAM, which did not have any significant effect (Fig. S6F).  
481 Similar results were obtained with mitochondrial preparations from muscle expressing AOX (Fig.  
482 S6G, H). In conclusion, our results based on AOX expression could be reproduced using different  
483 sources of mitochondria and demonstrate that CI supercomplex assembly affects the delivery of  
484 electrons to AOX.

## 485 Discussion

486 In this report we provide strong experimental support demonstrating that the  
487 superassembly of respiratory complexes into supercomplexes induce novel characteristics that  
488 deeply impact on the structure, kinetics and efficiency of the respiratory chain. We demonstrate  
489 it using isolated supercomplexes, mitochondrial preparations and cell cultures, and also using  
490 animal models. We also provide experimental data that explains why previously published results  
491 apparently contradict the main conclusion of this paper.

492 The main findings supporting our conclusion can be summarized as follows: 1) The  
493 absence of functional SCAF1 in mice causes a reduction in exercise performance both in males  
494 and females and compromise growth under food restriction in males. 2) The absence of functional  
495 SCAF1 eliminates the physical interaction between CIII and CIV in the SC III<sub>2</sub>+IV or within the  
496 respirasome (I+III<sub>2</sub>+IV). 3) In the absence of functional SCAF1, the respirasome can be  
497 assembled in some tissues despite the fact that the direct interaction between CIII and CIV is

498 absent. 4) The absence of SCAF1 destabilizes the respirasome, reduces both oxygen consumption  
499 and NADH oxidation and increases ROS production. 5) The interaction between CI and CIII  
500 decreases the rates of NADH oxidation and respiration by AOX, implying the existence of a  
501 partially segmented CoQ pool driven by the superassembly of CI and CIII.

502 Overall, the more relevant conclusion of our work is that the formation of respiratory  
503 supercomplexes modify the kinetics and the flux of electrons occurring with non-superassembled  
504 complexes. In one side, the role of SCAF1 in the respirasome becomes now clear. After strong  
505 discrepancies, there is a general consensus that SCAF1 is required for the superassembly of  
506 SC:III<sub>2</sub>+IV and to provide stability to the respirasome (Cogliati et al., 2016; Lobo-Jarne et al.,  
507 2018). There is also agreement in that SCAF1 function is lost in the mutated form of SCAF1 that  
508 naturally arise in the C57BL/6 sub-strains (Enríquez, 2019; Lapuente-Brun et al., 2013). In spite  
509 of that, BL6 heart mitochondria still assemble bona-fide respirasomes, which are structurally  
510 different, less stable and functionally impaired. These findings clarify the role of SCAF1 in the  
511 respirasome and the relevance of the interaction between CIII and CIV. On the other side, the  
512 expression of AOX in cells and in mice and the ability to genetically control the free or  
513 superassembled status of CI, allowed us to confirm that the delivery of electrons from CI but not  
514 CII to AOX or CIV is asymmetric only if the formation of supercomplex I+III<sub>2</sub> is occurring. These  
515 results confirm that superassembly of CI and CIII allow a partially segregation of the CoQ pool.  
516 Interestingly, a very recent paper from the group of Sazanov studying the kinetic properties of  
517 NADH to Cyt c electron transfer of the isolated supercomplex I+III<sub>2</sub> also found that CoQ trapping  
518 within isolated respiratory supercomplex I+III<sub>2</sub> limits CI turnover (Letts et al., 2019).

519 In addition to the major findings, we exhaustive re-evaluated the mitochondrial BNGE  
520 profiles from a variety of murine sources and analyzed the stability of the sample under several  
521 conditions using advanced data-independent proteomics. This analysis provided relevant new  
522 knowledge to better interpret BNGE analysis. In one hand, the Blue-DiS technology allowed us  
523 to confirm, from a true hypothesis-free perspective, the presence, composition and stoichiometry  
524 of the OXPHOS CI, CIII, CIV and CV in free and superassembled forms. Thus, while the protein  
525 composition of these complexes is maintained, the proportion of OXPHOS supercomplexes is

526 tissue-specific. Moreover we demonstrate that regardless of the different positions where the  
527 respirasome migrate, it maintains a constant stoichiometry of I+III<sub>2</sub>+IV, a result that is in full  
528 agreement with the different cryo-electron-microscopy derived structures published to date (Gu  
529 et al., 2016; Letts et al., 2016; Sousa et al., 2016; Wu et al., 2016). This estimation stresses the  
530 necessity to correct the experimentally unsupported tendency to assume that the different bands  
531 of the respirasome contain increasing amounts of complex IV and to define the band with the  
532 faster migration rate as the I+III<sub>2</sub>+IV respirasome and those with a higher apparent molecular  
533 weight as successive megacomplexes (Lobo-Jarne et al., 2018). It is advisable to restrict the use  
534 of the term megacomplex to define the association between SCs (Guo et al., 2017). Nevertheless,  
535 it is remarkable that the respirasome migrate persistently in multiple bands, a phenomenon that  
536 require further investigation of the potential partners. The Blue-DiS analysis also confirmed, from  
537 a completely unbiased perspective, that SCAF1 is the main assembly factor which is present in  
538 SC containing CIII and CIV. On the other hand, we describe unequivocally the existence of novel  
539 SCs: I+IV that co-migrate between the free CI and SC: I+III<sub>2</sub> and I+IV<sub>2</sub> that co-migrate with SC:  
540 I+III<sub>2</sub>; and the co-migration of CI with CIV in the area of the respirasomes. CI and CIV  
541 associations could be predicted from the evidence obtained by cryo-electron-microscopy that the  
542 interaction between CI and CIII<sub>2</sub> is independent from that between CI and CIV (Letts et al., 2016;  
543 Sousa et al., 2016). SC I+VI<sub>2</sub> was however unexpected. This novel SC, as well as some of the  
544 already known associations may represent true SCs or partially disassembled elements from larger  
545 complexes. In any case, their characterization in the BNGE is of major relevance because they  
546 can lead to inaccurate interpretations. This may be the case of the proposed novel fast migrating  
547 respirasome (I+III<sub>2</sub>+IV) that comigrate with I+III<sub>2</sub>, despite the different molecular weight, solely  
548 based on the fact the CI, CIII and CIV co-migrate in the same band (Sun et al., 2016). The co-  
549 migration of I+III<sub>2</sub> with I+IV<sub>2</sub> is a more plausible explanation, since they have a very similar MW.  
550 The co-migration CI with CIV in the area of the respirasomes, well above SC: I+III<sub>2</sub>, does not  
551 contain IV dimers and the added molecular weight of CI and CIV does not justify its apparent  
552 MW. The fact that 2D-BNGE/DDM splits CI and CIV suggest as the more plausible explanation  
553 that this co-migration imply the presence of a SC I+IV that interact with an unknown partner.

554 This additional SC may again flaw our interpretation of the BNGE gels. Thus, when the gels are  
555 performed with a steep gradient or short run (as it is the case of the more used pre-casted native  
556 gels) the SCs I+III<sub>2</sub>+IV (the faster migrating band) and this particular SC: (I+IV)\* may overlap  
557 (as a potential example see (Lobo-Jarne et al., 2018)) leading to the wrong interpretation solely  
558 based on the position of CIV that this band correspond to a respirasome.

559 A third important discovery reported here is that the respirasome and the SC: III<sub>2</sub>+IV, and  
560 at less extent SC I+III<sub>2</sub>, are unstable after disruption of the mitochondrial membranes even if  
561 preserved at 4 °C. This previously unnoticed phenomenon raises concerns in the interpretation of  
562 experiments aimed to measure the proportion and function of SCs when mitochondrial membrane  
563 integrity is not preserved. More strikingly, the loss of respirasome and SC: III<sub>2</sub>+IV is paralleled  
564 by the specific proteolytic processing of SCAF1 by calpain-1 that causes the processed form of  
565 SCAF1 to migrate together with CIV. If this cleavage is physiologically relevant or not need to  
566 be further investigated, but at this point it explains discrepant results in the literature that  
567 considered that SCAF1 as a shorter protein that acts as a mere isoform of CIV (Zhang et al., 2016).  
568 By the same token it may explain the unexpected presence of variable amounts of SCAF1  
569 associated with free CIV. Our observation is also coherent with the description of two respirasome  
570 structures by several groups (Letts et al., 2016; Sousa et al., 2016) that differ in the connection  
571 between III<sub>2</sub> and IV that is either present (tight respirasome) or absent (loose respirasome). Our  
572 finding also explains the reported conversion of the tight respirasome into the loose one with time  
573 (Letts et al., 2016). Therefore, these observations largely clarify the investigation of the  
574 functional role of the respiratory supercomplexes using BNGE.

575 In summary, in this report we show that superassembly between respiratory complexes  
576 substantially enhances the respiratory capacity of the electron transport chain while minimizing  
577 ROS production. Superassembly establishes a segmented CoQ pool through the association  
578 between CI and CIII, while SCAF1 plays a critical role in the III<sub>2</sub>+IV interaction affecting the  
579 structure and kinetic properties of the respirasome. Hence, SCAF1 is a key factor in the regulation  
580 of the energy metabolism, optimizing efficiency under high energy demands or restricted  
581 availability of nutrients.

## 582 Acknowledgments

583 This study was supported by MINECO: SAF2015-65633-R, MCIU: RTI2018-099357-B-  
584 I00, CIBERFES (CB16/10/00282) and HFSP (RGP0016/2018) to JAE; MINECO-BIO2015-  
585 67580-P, and PGC2018-097019-B-I00, ISCIII-IPT13/0001, ISCIII-SGEFI/FEDER, ProteoRed)  
586 the Fundació MaratóTV3 (grant 122/C/2015) and “la Caixa” Banking Foundation (project code  
587 HR17-00247) to JV. The CNIC is supported by the Ministry of Economy, Industry and  
588 Competitiveness (MEIC) and the Pro-CNIC Foundation, and is a Severo Ochoa Center of  
589 Excellence (MINECO award SEV-2015-0505).

## 590 Author contributions:

591 EC, JV & JAE: conceived and designed the analysis, EC, ML-L, FG-M-M. and JS-C performed  
592 the proteomic analysis. SC, AG, PH-A RA-P, YM and MC-A: performed the BNGE and the  
593 respirasomes functional analysis. SC, MC-A, J.R.H and R.A.C performed the *in vivo* experiments.  
594 EC, SC, ML-L, JV, PH-A, JV and JAE interpreted the results. EC, JV and JAE wrote the paper.

## 595 References

- 596 Acin-Perez, R. (2003). An intragenic suppressor in the cytochrome c oxidase I gene of mouse  
597 mitochondrial DNA. *Hum. Mol. Genet.* *12*, 329–339.
- 598 Acín-Pérez, R., Fernández-Silva, P., Peleato, M.L.M.L.M.L., Pérez-Martos, A., and Enriquez,  
599 J.A.J.A. (2008). Respiratory Active Mitochondrial Supercomplexes. *Mol. Cell* *32*, 529–539.
- 600 Bayona-Bafaluy, M.P.M.P., Movilla, N., Pérez-Martos, A., Fernández-Silva, P., and Enriquez,  
601 J.A.J.A. (2008). Functional genetic analysis of the mammalian mitochondrial DNA encoded  
602 peptides: A mutagenesis approach. *Methods Mol. Biol.* *457*, 379–390.
- 603 Bianchi, C., Genova, M.L., Parenti Castelli, G., and Lenaz, G. (2004). The Mitochondrial  
604 Respiratory Chain Is Partially Organized in a Supercomplex Assembly. *J. Biol. Chem.* *279*,  
605 36562–36569.
- 606 Blaza, J.N., Serreli, R., Jones, A.J.Y., Mohammed, K., and Hirst, J. (2014). Kinetic evidence  
607 against partitioning of the ubiquinone pool and the catalytic relevance of respiratory-chain  
608 supercomplexes. *Proc. Natl. Acad. Sci.* *111*, 15735–15740.
- 609 Calvo, S.E., Clauser, K.R., and Mootha, V.K. (2016). MitoCarta2.0: An updated inventory of  
610 mammalian mitochondrial proteins. *Nucleic Acids Res.* *44*, D1251–D1257.
- 611 Cogliati, S., Calvo, E., Loureiro, M., Guaras, A.M.A.M.A.M., Nieto-Arellano, R., Garcia-  
612 Poyatos, C., Ezkurdia, I., Mercader, N., Vázquez, J., and Enriquez, J.A.J.A. (2016). Mechanism  
613 of super-assembly of respiratory complexes III and IV. *Nature* *539*, 579–582.
- 614 Diaz, F., Fukui, H., Garcia, S., and Moraes, C.T. (2006). Cytochrome c Oxidase Is Required for  
615 the Assembly/Stability of Respiratory Complex I in Mouse Fibroblasts. *Mol. Cell. Biol.* *26*,  
616 4872–4881.

- 617 Enríquez, J.A. (2019). Mind your mouse strain. *Nat. Metab.* *1*, 5–7.
- 618 Enríquez, J.A.J.A. (2016). Supramolecular Organization of Respiratory Complexes. *Annu. Rev. Physiol.* *78*, 533–561.
- 620 Eubel, H., Jänsch, L., and Braun, H.-P. (2003). New Insights into the Respiratory Chain of Plant  
621 Mitochondria. Supercomplexes and a Unique Composition of Complex II. *Plant Physiol.* *133*,  
622 274–286.
- 623 Fedor, J.G., and Hirst, J. (2018). Mitochondrial Supercomplexes Do Not Enhance Catalysis by  
624 Quinone Channeling. *Cell Metab.* *28*, 525–531.e4.
- 625 Garaude, J., Acín-Pérez, R., Martínez-Cano, S., Enamorado, M., Ugolini, M., Nistal-Villán, E.,  
626 Hervás-Stubbs, S., Pelegrín, P., Sander, L.E.L.E., Enríquez, J.A.J.A.J.A., et al. (2016).  
627 Mitochondrial respiratory-chain adaptations in macrophages contribute to antibacterial host  
628 defense. *Nat. Immunol.* *17*, 1037–1045.
- 629 García-Poyatos, C., Cogliati, S., Calvo, E., Hernansanz-Agustín, P., Lagarrigue, S., Magni, R.,  
630 Botos, M., Langa, X., Amati, F., Vázquez, J., et al. (2019). Respiratory supercomplexes provide  
631 metabolic efficiency in zebrafish. *BioRxiv* [doi.org/10.1101/818286](https://doi.org/10.1101/818286).
- 632 Glytsou, C., Calvo, E., Cogliati, S., Mehrotra, A., Anastasia, I., Rigoni, G., Raimondi, A.,  
633 Shintani, N., Loureiro, M., Vazquez, J., et al. (2016). Optic Atrophy 1 Is Epistatic to the Core  
634 MICOS Component MIC60 in Mitochondrial Cristae Shape Control. *Cell Rep.* *17*, 3024–3034.
- 635 Greggio, C., Jha, P., Kulkarni, S.S., Lagarrigue, S., Broskey, N.T., Boutant, M., Wang, X.,  
636 Conde Alonso, S., Ofori, E., Auwerx, J., et al. (2017). Enhanced Respiratory Chain  
637 Supercomplex Formation in Response to Exercise in Human Skeletal Muscle. *Cell Metab.* *25*,  
638 301–311.
- 639 Gu, J., Wu, M., Guo, R., Yan, K., Lei, J., Gao, N., and Yang, M. (2016). The architecture of the  
640 mammalian respirasome. *Nature* *537*, 639–643.
- 641 Guarás, A., Perales-Clemente, E., Calvo, E., Acín-Pérez, R., Loureiro-Lopez, M., Pujol, C.,  
642 Martínez-Carrascoso, I., Nuñez, E., García-Marqués, F., Rodríguez-Hernández, M.A.M.A., et  
643 al. (2016). The CoQH2/CoQ Ratio Serves as a Sensor of Respiratory Chain Efficiency. *Cell*  
644 *Rep.* *15*, 197–209.
- 645 Guo, R., Zong, S., Wu, M., Gu, J., and Yang, M. (2017). Architecture of Human Mitochondrial  
646 Respiratory Megacomplex I2III2IV2. *Cell* *170*, 1247–1257.e12.
- 647 Huertas, J.R.R., Al Fazazi, S., Hidalgo-Gutierrez, A., López, L.C.C., and Casuso, R.A.A.  
648 (2017). Antioxidant effect of exercise: Exploring the role of the mitochondrial complex I  
649 superassembly. *Redox Biol.* *13*, 477–481.
- 650 Ishihama, Y. (2005). Proteomic LC–MS systems using nanoscale liquid chromatography with  
651 tandem mass spectrometry. *J. Chromatogr. A* *1067*, 73–83.
- 652 Lapuente-Brun, E., Moreno-Loshuertos, R., Acín-Pérez, R., Latorre-Pellicer, A., Colaś, C.,  
653 Balsa, E., Perales-Clemente, E., Quirós, P.M.P.M., Calvo, E., Rodríguez-Hernández, M.A.A., et  
654 al. (2013). Supercomplex assembly determines electron flux in the mitochondrial electron  
655 transport chain. *Science* (80-. ). *340*, 1567–1570.
- 656 Lenaz, G., and Genova, M.L. (2007). Kinetics of integrated electron transfer in the  
657 mitochondrial respiratory chain: random collisions vs. solid state electron channeling. *Am. J.*  
658 *Physiol. Physiol.* *292*, C1221–C1239.
- 659 Letts, J.A., Fiedorczuk, K., and Sazanov, L.A. (2016). The architecture of respiratory

- 660 supercomplexes. *Nature* 537, 644–648.
- 661 Letts, J.A., Fiedorczuk, K., Degliesposti, G., Skehel, M., and Sazanov, L.A. (2019). Structures  
662 of Respiratory Supercomplex I+III<sub>2</sub> Reveal Functional and Conformational Crosstalk. *Mol. Cell*  
663 75, 1131-1146.e6.
- 664 Lobo-Jarne, T., Nývltová, E., Pérez-Pérez, R., Timón-Gómez, A., Molinié, T., Choi, A.,  
665 Mourier, A., Fontanesi, F., Ugalde, C., and Barrientos, A. (2018). Human COX7A2L Regulates  
666 Complex III Biogenesis and Promotes Supercomplex Organization Remodeling without  
667 Affecting Mitochondrial Bioenergetics. *Cell Rep.* 25, 1786-1799.e4.
- 668 Lopez-Fabuel, I., Le Douce, J., Logan, A., James, A.M., Bonvento, G., Murphy, M.P., Almeida,  
669 A., and Bolaños, J.P. (2016). Complex I assembly into supercomplexes determines differential  
670 mitochondrial ROS production in neurons and astrocytes. *Proc. Natl. Acad. Sci.* 113, 13063–  
671 13068.
- 672 Maranzana, E., Barbero, G., Falasca, A.I., Lenaz, G., and Genova, M.L. (2013). Mitochondrial  
673 Respiratory Supercomplex Association Limits Production of Reactive Oxygen Species from  
674 Complex I. *Antioxid. Redox Signal.* 19, 1469–1480.
- 675 Milenkovic, D., Blaza, J.N., Larsson, N.-G., and Hirst, J. (2017). The Enigma of the Respiratory  
676 Chain Supercomplex. *Cell Metab.* 25, 765–776.
- 677 Moreno-Loshuertos, R., Acín-Pérez, R., Fernández-Silva, P., Movilla, N., Pérez-Martos, A., De  
678 Cordoba, S.R.S.R., Gallardo, M.E.E., and Enríquez, J.A.J.A. (2006). Differences in reactive  
679 oxygen species production explain the phenotypes associated with common mouse  
680 mitochondrial DNA variants. *Nat. Genet.* 38, 1261–1268.
- 681 Navarro, P., and Vázquez, J. (2009). A Refined Method To Calculate False Discovery Rates for  
682 Peptide Identification Using Decoy Databases. *J. Proteome Res.* 8, 1792–1796.
- 683 Perales-Clemente, E., Bayona-Bafaluy, M.P.P., Pérez-Martos, A., Barrientos, A., Fernández-  
684 Silva, P., Enriquez, J.A.A., Perez-Martos, A., Barrientos, A., Fernandez-Silva, P., and Enriquez,  
685 J.A.A. (2008). Restoration of electron transport without proton pumping in mammalian  
686 mitochondria. *Proc. Natl. Acad. Sci.* 105, 18735–18739.
- 687 Perales-Clemente, E., Fernández-Vizarra, E., Acín-Pérez, R., Movilla, N., Bayona-Bafaluy,  
688 M.P.M.P., Moreno-Loshuertos, R., Pérez-Martos, A., Fernández-Silva, P., Enríquez, J.A.J.A.,  
689 Fernández-Vizarra, E., et al. (2010). Five entry points of the mitochondrially encoded subunits  
690 in mammalian complex I assembly. *Mol. Cell. Biol.* 30, 3038–3047.
- 691 Quintana-Cabrera, R., Quirin, C., Glytsou, C., Corrado, M., Urbani, A., Pellattiero, A., Calvo,  
692 E., Vázquez, J., Enríquez, J.A., Gerle, C., et al. (2018). The cristae modulator Optic atrophy 1  
693 requires mitochondrial ATP synthase oligomers to safeguard mitochondrial function. *Nat.*  
694 *Commun.* 9, 3399.
- 695 Schagger, H. (2000). Supercomplexes in the respiratory chains of yeast and mammalian  
696 mitochondria. *EMBO J.* 19, 1777–1783.
- 697 Schagger, H. (2002). Respiratory chain supercomplexes of mitochondria and bacteria. *Biochim.*  
698 *Biophys. Acta - Bioenerg.* 1555, 154–159.
- 699 Sousa, J.S., Mills, D.J., Vonck, J., and Kühlbrandt, W. (2016). Functional asymmetry and  
700 electron flow in the bovine respirasome. *Elife* 5, 1–17.
- 701 Sun, D., Li, B., Qiu, R., Fang, H., and Lyu, J. (2016). Cell Type-Specific Modulation of  
702 Respiratory Chain Supercomplex Organization. *Int. J. Mol. Sci.* 17, 926.



703 Della Torre, S., Mitro, N., Meda, C., Lolli, F., Pedretti, S., Barcella, M., Ottobrini, L., Metzger,  
704 D., Caruso, D., and Maggi, A. (2018). Short-Term Fasting Reveals Amino Acid Metabolism as  
705 a Major Sex-Discriminating Factor in the Liver. *Cell Metab.* 28, 256-267.e5.

706 Wittig, I., Braun, H.P., and Schägger, H. (2006). Blue native PAGE. *Nat. Protoc.* 1, 418–428.

707 Wu, M., Gu, J., Guo, R., Huang, Y., and Yang, M. (2016). Structure of Mammalian Respiratory  
708 Supercomplex I1III2IV1. *Cell* 167, 1598-1609.e10.

709 Zhang, K., Wang, G., Zhang, X., Hüttemann, P.P., Qiu, Y., Liu, J., Mitchell, A., Lee, I., Zhang,  
710 C., Lee, J., et al. (2016). COX7AR is a Stress-inducible Mitochondrial COX Subunit that  
711 Promotes Breast Cancer Malignancy. *Sci. Rep.* 6, 31742.

## 712 **Figure Legends**

713 **Figure 1. SCAF1 deficiency induces a conspicuous phenotype in mice. A,** BNGE

714 followed by western-blot showing the absence or presence of SCAF1 in the indicated

715 tissue and mouse strain. 113: C57BL/6J0laHsd mice with the functional version of

716 SCAF1; 111: C57BL/6J0laHsd mice (it harbors a non-functional version of SCAF1); KO

717 C57BL/6J0laHsd mice without SCAF1. **B,** Scheme of the food restriction experiment

718 analyzed in **C. D,** Effect of SCAF1 on the maximum speed running in a treadmill by the

719 indicated mouse groups.

720 **Figure 2. Blue-DiS evidence of the formation of OXPHOS supercomplexes. A,** For each

721 complex, the number of protein PSMs was plotted against normalized protein abundances (see

722 Methods), showing that the relative proportions of proteins from CI (blue points), CIII (red points)

723 and/or CIV (green points) are constant in specific BNGE slices from liver mitochondria indicating

724 the presence of multimeric structures. Slices 2-4 correspond to a ternary structure (I+III+IV),

725 slices 5-6 and 9-10 to binary structures (I+III and III+IV, respectively) and slices 8 and 15 to

726 monomeric forms (I and IV, respectively). **B,** Similar results are obtained in heart and brain

727 mitochondria; for simplicity only one slice with the tertiary structure is shown. **C,** Cross-

728 correlation analysis of abundances of proteins forming part of each one of the supercomplexes,

729 showing that their relative proportions are tightly maintained across the consecutive slices. **D,**

730 Cross-correlation analysis of abundances of proteins of the indicated supercomplexes across the

731 four mitochondrial types, showing that their relative proportions are also constant independently

732 of the mitochondrial origin. **E,** Normalized profiles of CI, CIII and CIV from heart mitochondria

733 (black line) (see Methods) can be accurately explained as a superimposition (dashed thick red  
734 line) of six gaussian peaks corresponding to monomeric and multimeric structures, as indicated.  
735 The gaussian deconvolution was performed in a hypothesis-free manner by a simultaneous least-  
736 squares fitting of the three normalized profiles adjusting the position, width and height of each  
737 peak (thin lines) without any numeric constraint. In the case of CIV two additional peaks (CIV<sub>2</sub>  
738 and CIV<sub>m</sub>) had to be added to the model in order to explain the normalized profile (arrows). **F**,  
739 Gaussian components used to model the normalized profiles of the four mitochondrial types. For  
740 simplicity, the two multimeric CIV structures are not represented.

741 **Figure 3. Structural consequences of SCAF1-deficiency in the formation of SCs. A**,  
742 2DBNGE (Dig/DDM) analysis of heart mitochondria resolving complexes and supercomplexes  
743 in the first dimension and disrupting SCs into their component complexes in the second  
744 dimension. NDUFA9 immunodetection in red indicate the migration of CI, COI immunodetection  
745 in red indicate migration of CIV and CORE2 immunodetection in green indicate migration of  
746 CIII. **B**, Gaussian deconvolution of the normalized profiles of heart and liver mitochondria from  
747 BL6 mice, where the function of SCAF1 protein is impaired. Red asterisks indicate the position  
748 of SC III<sub>2</sub>+IV, which is completely absent in both tissues, and of the respirasome, which is absent  
749 in the liver but remains detectable in the heart. **C**, 2DBNGE (Dig/DDM) resolving complexes and  
750 supercomplexes in the first dimension and disrupting SCs into their component complexes in the  
751 second dimension. Samples from BL6, CD1 and BL6:S<sup>113</sup> heart are compared highlighting the  
752 area of migration of respirasomes, with the different traces at the bottom. Red asterisk indicates  
753 absence of the respirasome-derived III<sub>2</sub>+IV only in the BL6 sample indicating that III<sub>2</sub>+IV are not  
754 physically linked in SCAF1-deficient respirasomes. NDUFA9 immunodetection in red indicates  
755 the migration of CI, COI immunodetection in red indicate migration of CIV and CORE2  
756 immunodetection in green indicate migration of CIII. **D**, representation of the two structurally  
757 different respirasomes.

758 **Figure 4. Functional consequences of SCAF1-deficiency in the activity of the respirasome.**  
759 **A**, Scheme representing the experimental set up to analyze the function of the respirasomes. **B**,  
760 Representative oxygen consumption traces obtained with heart respirasomes excised from the

761 BNGE and derived from either C57BL/6 or CD1 animals. The addition of different components  
762 is indicated. **C & D**, NADH-dependent respiration rate normalized by TMPD-respiration rate (**C**),  
763 or by mg. of protein (**D**) of heart respirasomes excised from BNGE from the indicated mouse  
764 strain and measured in a Clark oxygen electrode. **e**, NADH oxidation rate by heart respirasomes  
765 eluted from BNGE excised bands of the indicated mouse strain and measured by  
766 spectrophotometry. **F & G**, Representative traces (**F**) and quantitative data (**G**) of H<sub>2</sub>O<sub>2</sub>  
767 production upon NADH oxidation (upper-panel) or CoQH<sub>2</sub> oxidation (lower panel) by heart  
768 respirasomes eluted from BNGE excised bands of the indicated mouse strain and estimated by  
769 Amplex Red. When CoQH<sub>2</sub> oxidation was assayed rotenone was included to prevent the  
770 interaction of CoQH<sub>2</sub> with CI, and the assay was performed.

771 **Figure 5. Supercomplexes are unstable upon mitochondrial membrane disruption.** **A**, BNGE  
772 resolving complexes and SCs from CD1 liver from intact or digitonized mitochondria  
773 preincubated during the indicated time at 4 °C, and probed with the indicated antibody. **B**, BNGE  
774 resolving complexes and SCs from CD1 liver from digitonized mitochondria preincubated during  
775 the indicated time at 4 °C, and probed with the indicated antibody. **C**, 2D-BNGE/PAGE resolving  
776 complexes and SCs in the 1st dimension and protein components in the 2nd dimension from CD1  
777 liver digitonized preparation preincubated 72 h at 4 °C showing that SCAF1 is processed  
778 (SCAF1\*). The membrane was immunoblotted with the indicated antibodies. **D**, Structure of  
779 SCAF1 sequence, mapping CIII- (in green), and CIV- (in yellow) interacting regions. The  
780 predicted calpain-1 processing site is indicated with a blue line. **E**, Quantitative analysis of the  
781 SCAF1-derived tryptic (LTSSVTAYDYSYGK, in blue), and calpain 1-processed  
782 (SSVTAYDYSYGK, in orange) peptides. Both peptides were quantified in the BNGE slices  
783 corresponding to SCs I+III<sub>2</sub>+IV and III<sub>2</sub>+IV and to IV<sub>2</sub>, and to CIV in fresh or in 4°C-incubated  
784 liver mitochondria-enriched fractions. The calpain 1-processed peptide was only detected in the  
785 non-fresh preparations, attached to CIV and IV<sub>2</sub> and also to the respirasome. A structural  
786 interpretation of these results is presented at the left; the blue and orange shadows indicate  
787 whether the SCAF1 peptide is tryptic or processed, respectively. **F**, 2D BNGE/PAGE showing  
788 that the proteolytic cleavage of SCAF1 can be prevented by inhibition of Calpain-1. **G**,

789 BNGE/PAGE analysis of liver mitochondria showing that the stability of the respirasome and the  
790 SC III<sub>2</sub>+IV is preserved after digitonization in the presence of a calpain-1 inhibitor. **H**, BNGE  
791 profile for CIV (COI-red) and SCAF1 (green) in heart samples maintained at 4°C after  
792 digitonization during the indicated time.

793 **Figure 6. The superassembly between complexes I and III modulates the activity of CI and**  
794 **functionally segments the CoQ pool. A**, Scheme representing the differential flux of electrons  
795 to AOX from the indicated mutant cell line. **B**, Impact of the presence of CIII in the delivery of  
796 electrons from CI and CII to AOX. **C**, DPI sensitive NADH oxidation capacity of the  
797 mitochondrial preparation from the indicated cell line. **D**, Scheme representing the simultaneous  
798 flux of electrons from either CI or CII to AOX from the indicated mutant cell line. **E**, Estimation  
799 of the impact of the simultaneous addition of substrates for CII (succinate) on the CI-dependent  
800 respiration with CI substrates (glutamate and malate) in the presence or absence of CIII. **F**, Impact  
801 of CIII and CIV superassembly on the maximum respiration capacity with CII (succinate) or CI  
802 (glutamate and malate) substrates vs. both substrates added simultaneously. **G**, Proportion of the  
803 maximum respiration achievable by CI substrates in the presence or absence of CI and CIII  
804 superassembly. **H**, Analysis of the flux of electrons from NADH and CI or succinate and CII to  
805 AOX in the indicated freeze-thaw mitochondrial from wild type cells or mutant cells lacking CIV  
806 or CIII all expressing AOX. **I**, Flux of electrons from NADH and CI to AOX or CIV in intact  
807 heart mitochondria expressing AOX and monitored by oxygen consumption (left panel) or  
808 autofluorescence of NADH (right panel).

809

810

811 **STAR METHODS**

812 **LEAD CONTACT AND MATERIALS AVAILABILITY**

813 Request of information and material should be made to José Antonio Enriquez. Mouse and cell  
814 lines generated in this study are available upon request for a non-commercial use under a Material  
815 Transfer agreement.

816 **EXPERIMENTAL MODEL AND SUBJECT DETAILS**

817 **Experimental Models** This study used mouse and cellular models which were generated in out  
818 laboratory.

819 **Mouse generation:** 1) C57BL/6J<sup>OlaHsd</sup> mice with the functional version of SCAF1 were  
820 generated as previously described (Cogliati et al., 2016). C57BL/6J<sup>OlaHsd</sup> mice knock out for  
821 SCAF1 were generated by microinjection of ES cells knock-out in the first alleles from EuMMCR  
822 repository in a C57BL/6J<sup>OlaHsd</sup> blastocysts. Further, the blastocysts were implanted in a pseudo  
823 pregnant female C57BL/6J<sup>OlaHsd</sup>. 2) AOX expressing mice were generated by *genOway* by  
824 targeted insertion of the AOX cDNA within the Rosa26 locus via homologous recombination in  
825 embryonic stem cells originally derived from a 129 strain of mouse and injected into C57BL/6J  
826 blastocysts and then re-implanted into OF1 pseudo-pregnant, and allowed to develop to term.  
827 After removal the neo cassette flanked by FLP sites, the selected knock-in animals were then  
828 systematically backcrossed for more than 20 generations to C57BL/6J<sup>OlaHsd</sup> background. The  
829 expression of the transgene is dependent upon the Cre recombinase mediated excision of a *LoxP*  
830 flanked transcriptional “STOP” cassette upstream the AOX cDNA. For this study we induce the  
831 expression of AOX in muscle and heart by breeding the AOX animals with expressing CRE under  
832 the ACTA promoter.

833 **Mouse experimentation.** All animal procedures conformed to EU Directive 86/609/EEC and  
834 Recommendation 2007/526/EC regarding the protection of animals used for experimental and  
835 other scientific purposes, enforced in Spanish law under Real Decreto 1201/2005. Approval of  
836 the different experimental protocols requires the estimation of the adequate sample size as well  
837 as the definition of the randomization and blinding criteria. The mice were fed a standard chow  
838 diet unless other food regime was required (5K67 LabDiet).

839 **Alternative fasting protocol.** Starting from weaning, mice undergo to 48h of fasting alternate  
840 between 24h of controlled feeding (standard chow diet 5K67LabDiet Rod18-A; LASQCDiet) both  
841 with free access to water for 40 days. The weight has been recorded at the end of feeding phase.

842 **Maximal incremental running test.** Mice was forced to run on a treadmill at 20° slope (LE8700  
843 (76-0303), Treadmill Panlab, Harvard Apparatus). After a minute of acclimatization at 10 cm/s,  
844 the speed was increased up to 16 cm/s for 5 minutes and further every 2 minutes by 3cm/s until  
845 exhaustion, that was considered to reach when the mouse spent 3s in the back of the rack.

846 **Cellular Models:** All cell lines were grown in DMEM (GibcoBRL) supplemented with 5% FBS  
847 (foetal bovine serum, Gibco BRL). mtDNA-less mouse cells were generated by long term growth  
848 of L929 mouse cell line (ATCC CCL-1) in the presence of high concentrations of Ethidium  
849 Bromide (EthBr) as previously described(Acin-Perez, 2003). Control cells (control cells) were  
850 generated by transformation of  $\rho^0$ 929neo cells by cytoplasm fusion using NIH3T3 fibroblasts as  
851 mitochondrial donors(Bayona-Bafaluy et al., 2008).

## 852 **METHOD DETAILS**

853 **Blue-Native Gel Electrophoresis:** Supercomplex levels and compositions were analyzed in  
854 isolated mitochondria from different tissues and cells by blue native electrophoresis  
855 (BNGE)(Wittig et al., 2006). Mitochondrial proteins from heart tissue were solubilized with  
856 10% digitonin (4g/g) (Sigma D5628) and run on a 3%–13% gradient Blue Native gel. The  
857 gradient gel was prepared in 1.5 mm glass plates using a gradient former connected to a  
858 peristaltic pump. After electrophoresis, the gels were further processed for proteomic

859 analysis, western blotting, 2D SDS-PAGE or 2D-BNGE (DDM) analysis. For 2D SDS-  
860 PAGE, the first-dimension lanes were excised from the gel and incubated 1h at room  
861 temperature in 1% SDS and 1%  $\beta$ -mercaptoethanol and run in a 16.5% second denaturing  
862 gel. For 2D-BNGE (DDM) and 2D-BNGE Digitonin, first-dimension lanes were excised  
863 from the gel and run in a 3-13% gradient gel in native condition adding 0.02% of DDM to  
864 the cathode buffer.

865 ***Immunodetection of complexes and supercomplexes:*** After BNGE, 2DBNGE/DIG,  
866 2DBNGE/DDM or 2DBNGE/PAGE, proteins were electroblotted onto PVDF transfer  
867 membrane (Immobilon-FL, 0.45  $\mu$ m, Merck millipore, IPFL00010) for 1 h at 100 V in  
868 transfer buffer (48 mM Tris, 39 mM glycine, 20 % EtOH). A Mini Trans- Blot Cell system  
869 (BioRad) was used. Sea Blocking buffer (Thermo Scientific 37527) or PBS with 5 % BSA  
870 was used for 1 hour at room temperature (RT) to avoid non-specific binding of antibodies.  
871 For protein detection, antibodies were incubated with the membrane for 2 hours at RT.  
872 Secondary antibodies were incubated for 45 minutes at RT. The membrane was washed with  
873 PBS 0.1 % Tween-20 for 5 minutes three times between primary and secondary antibodies  
874 and after secondary antibodies, the last wash was only PBS. To study supercomplexes  
875 assembly, the PVDF membrane was sequentially probed with antibodies Complex I (anti-  
876 NDUFA9, Abcam ab14713), Complex IV (anti-COI. Invitrogen 35-8100), Complex III (anti-  
877 core2, Proteintech), SCAF1 (anti-COX7A2L, St. John's laboratory STJ42268. This antibody  
878 was generated by immunization of rabbit with KLH conjugated synthetic peptide between  
879 37-65 amino acids from the central region of human COX7A2L. It recognizes an epitope in  
880 the common part of full size and processed SCAF1, allowing to visualize the processed  
881 SCAF1 migrated with CIV after Calpain processing as in Fig.5c and Fig.5f. This antibody  
882 was discontinued and substituted by the anti-COX7A2L, St. John's laboratory STJ110597  
883 produced with a full length recombinant human CoX7A2L that, in the same experimental  
884 conditions does not recognize the calpain-1 processed SCAF1 that need to be identified only  
885 by MS. Anti-MIC10 (MINOS1 Novusbio NBP1-91587) and anti-CHCHD3 (Proteintech  
886 25625-1-AP).

887 ***Proteomics by data-independent scanning (DiS) mass spectrometry (MS)***. DiS is a data-  
888 independent acquisition method that covers all possible fragmentations of precursors in the 400-  
889 1100 m/z range in two LC-MS runs and has already been successfully used to study the  
890 mitochondrial proteome (Cogliati et al., 2016; Glytsou et al., 2016; Quintana-Cabrera et al., 2018).  
891 DiS uses narrow MS/MS windows of 2 m/z, typical of data-dependent acquisition methods,  
892 allowing direct peptide identification by database searching and FDR control by using a  
893 conventional target/decoy competition strategy, without requiring peptide fragmentation libraries.  
894 The Blue-DiS workflow generated a permanent, multi-dimensional, high-resolution time-  
895 fragment mass map for all possible precursors present in each BNGE fraction and each  
896 mitochondrial sample, from which quantitative protein maps can be straightforwardly obtained  
897 with minimal computation. BNGE gels were excised in 26 slices taking as reference some discrete  
898 Coomassie stained bands: slice 6 corresponds to a band that mainly contains SC I + III<sub>2</sub>, slice 10  
899 to CV, slice 12 to free CIII<sub>2</sub>, and slice 15 to free CIV. All slices were cut into cubes (2x2 mm),  
900 reduced with 10mM DTT (GE Healthcare), alkylated with 55mM iodoacetamide (Sigma-Aldrich)  
901 and subjected to a standard overnight in-gel digestion at 37°C with 3 µg of sequencing grade  
902 trypsin (Promega, Madison, WI, USA) in 100 mM ammonium bicarbonate, pH 7.8. After  
903 desalting with C18 Omix cartridges (Agilent Technologies), the resulting tryptic peptide mixtures  
904 were injected onto a C-18 reversed phase (RP) nano-column (75µm I.D. and 50 cm, Acclaim  
905 PepMap, Thermo Fisher, San José, CA, USA) using an EASY-nLC 1000 liquid chromatography  
906 system (Thermo Fisher, San José, CA, USA) and analysed in a continuous gradient consisting of  
907 8–31% B for 130 min, 50–90% B for 1 min (B= 0.5% formic acid in acetonitrile). Peptides were  
908 eluted from the RP nanocolumn at a flow rate of ~200nl min<sup>-1</sup> to an emitter nanospray needle for  
909 real-time ionization and peptide fragmentation in either a Q-Exactive or a Q-Exactive HF mass  
910 spectrometer (Thermo Fisher). Each sample was analysed in two chromatographic runs covering  
911 different mass ranges (from 400 to 750 Da, and from 750 to 1,100 Da, respectively). The DiS  
912 cycle consisted of 175 sequential HCD MS/MS fragmentation events with 2-Da windows that  
913 covered the whole 350 Da range. HCD fragmentation was performed at 30 normalized collisional  
914 energy, a resolution of 17,500 and a maximum injection time of 80 ms with the AGC set to a



915 target of  $3 \times 10^5$  ions. The whole cycle lasted 30 s or less depending on ion intensity during  
916 chromatography. Peptide identification was performed using Sequest running under Proteome  
917 Discoverer 1.4 (Thermo Fisher Scientific), allowing two missed cleavages, and using 2 Da and  
918 20 p.p.m. precursor and fragment mass tolerances, respectively. Met oxidation and Cys  
919 carbamydomethylation were selected as dynamic and static modifications, respectively. FDR for  
920 peptide identification was controlled using a separate inverted database and the refined  
921 method(Navarro and Vázquez, 2009). Visualization, validation and quantification of MS/MS  
922 spectra from specific peptides was performed using Vseq script, as described(Cogliati et al.,  
923 2016).

924 ***Protein and complex profiling.*** Quantitative protein migration profiles from Blue-DiS analyses  
925 were obtained by spectral counting, summing up the number of peptide-spectrum matches (PSMs)  
926 of all peptides identified for each protein on each slice of the gel. In the case of protein complexes,  
927 the total PSMs of the proteins contained in the complex was used for quantification. The  
928 normalized BNGE profile of each complex was constructed by calculating the slope from the plot  
929 of protein PSMs in a given slice versus protein PSMs in a slice used as reference (the one with  
930 the highest number of PSMs). The normalized abundance of each protein within a complex was  
931 calculated as the slope from the plot of PSMs of the protein in the different slices versus the PSMs  
932 of the most abundant protein from the complex in the same slices.

933 ***Determination of stoichiometry between complexes in SC.*** We observed that the number of  
934 PSMs for each protein, as calculated by DiS, was approximately proportional to the number of  
935 tryptic peptides detectable by MS (NOP) (ED Fig. 3C, left). This finding agrees well with the use  
936 of the “protein abundance index” by other authors, which normalizes spectral counts by the  
937 number of detectable peptides(Ishihama, 2005). This consideration allowed us to calibrate the  
938 individual MS response of each protein, generating an estimation of the effective NOP (ED Fig.  
939 3C, right). By plotting, per each complex, the PSMs of the proteins against their effective NOP,  
940 we could estimate from the slopes the molar stoichiometries of complexes within each slice (ED  
941 Fig. 3d).

942 ***Activity of complexes or respirasomes from BNGE eluted bands.*** CD1, BL6:S<sup>111</sup> and BL6:S<sup>113</sup>  
943 heart mitochondria were extracted, processed and run in BN-PAGE as described above. CI, CIII<sub>2</sub>,  
944 CIV-monomer or respirasome bands were quickly excised from gels and minced on ice. The grist  
945 was immediately resuspended in Medium MAITE and respirasomes eluted by twirling for 4 hours  
946 at 4°C. Elution was collected and mixed with the appropriate volume of MAITE + 2.5 mg/ml  
947 BSA at 37 °C to reach 1 mL. Reaction was started by adding 100 μM NADH, 130 μM CoQ<sub>1</sub>,  
948 reduced DQ 130 μM, oxidized Cyt c 100 μM. NADH, oxidized CoQ<sub>1</sub> and Cyt c levels were  
949 tracked by recording absorbance at 340 nm, 289 nm and 550 nm, respectively for 240 sec in a  
950 UV/VISJASCO spectrophotometer. Optimal absorbance values were calculated by titration of  
951 each reactive in MAITE + 2.5 mg/ml BSA. DQ maximal absorbance peak could not be estimated  
952 due to the consequent turbidity of its dissolution in an aqueous environment. Baseline NADH  
953 oxidation and CoQ<sub>1</sub> reduction from the same elution was recorded after addition of 1 μM  
954 rotenone. Baseline Cyt c reduction from the same elution was recorded after addition of 2.5 μM  
955 antimycin A. Baseline Cyt c oxidation from the same elution was recorded after addition of 1 mM  
956 KCN.

957 ***Oxygen consumption by BNGE respirasome bands.*** CD1, BL6:S<sup>111</sup> and BL6:S<sup>113</sup> heart  
958 mitochondria were extracted, processed and run in BN-PAGE as described above. CIV-monomer  
959 or respirasome bands were quickly excised from gels and minced on ice. The grist was  
960 immediately resuspended in MAITE + 2.5 mg/ml BSA at 37°C and introduced in an Oxytherm  
961 System S1/MINI. Reaction was started by adding 100 μM reduced Cyt c for CIV-monomer or  
962 100 μM NADH for respirasomes. Oxygen levels were tracked for at least 180 seconds and  
963 baseline oxygen consumption was recorded after addition of 1 mM KCN for CIV-monomer or 1  
964 μM rotenone for respirasomes.

965 ***H<sub>2</sub>O<sub>2</sub> production by respirasomes from BNGE eluted bands.*** CD1, BL6:S<sup>111</sup> and BL6:S<sup>113</sup> heart  
966 mitochondria were extracted, processed and run in BN-PAGE as described above. Respirasome  
967 bands were quickly excised from gels and minced on ice. The grist was immediately resuspended  
968 in Medium MAITE and respirasomes eluted by twirling for 4 hours at 4°C. Elution was collected

969 and mixed with Amplex Red solution (Molecular probes), following manufacturer's instructions.  
970 Reaction was started by adding 100  $\mu$ M NADH or 100  $\mu$ M CoQH<sub>2</sub>+1 $\mu$ M rotenone. Amplex Red  
971 levels were tracked by recording fluorescence at 540/590 nm (exc/emm) for 2400 sec in a  
972 Fluoroskan Ascent fluorimeter (Thermo LabSystems). Baseline Amplex Red fluorescence from  
973 the same elution was recorded after addition of 5U/mL of SOD and Catalase.

974 ***NADH oxidation monitoring in intact mitochondria by autofluorescence.*** AOX expressing mice  
975 heart mitochondria were extracted as described above and immediately resuspended in medium  
976 MAITE at 4°C. Mitochondria were mixed with the appropriate volume of MAITE+ 2.5 mg/ml  
977 BSA at 37 °C to reach 100  $\mu$ l. Reaction was started by adding 5 mM Glu + 5 mM Mal  $\pm$  1 mM  
978 KCN, 5 mM SHAM or  $\pm$  1  $\mu$ M rotenone. NADH levels were tracked by recording  
979 autofluorescence at excitation/emission of 340/475 nm for 20 min in a Fluoroskan Ascent  
980 fluorimeter (Thermo LabSystems)

981 ***Oxygen consumption measurement.*** AOX expressing heart mitochondria of mitochondria from  
982 AOX expressing cell lines were extracted as described above and immediately resuspended in  
983 medium MAITE at 4°C. To permeabilize mitochondrial membranes, mitochondria were subjected  
984 to a freeze-thaw step. Intact or freeze-thawed mitochondria were mixed with the appropriate  
985 volume of MAITE + 2.5 mg/ml BSA at 37 °C and placed in an Oxytherm System S1/MINI.  
986 Reaction was started by adding 5 mM Glu + 5 mM Mal  $\pm$  10 mM succinate  $\pm$  1 mM KCN, 5 mM  
987 SHAM or  $\pm$  1  $\mu$ M rotenone. Permeabilized mitochondria were provided with 100  $\mu$ M NADH or  
988 100  $\mu$ M CoQ<sub>1</sub>H<sub>2</sub>. Baseline levels were recorded after addition of 1 $\mu$ M rotenone or 5 mM SHAM.

989 ***Activity of complexes in freeze-thaw mitochondria.*** AOX expressing heart mitochondria of  
990 mitochondria from AOX expressing cell lines were extracted as described above. Mitochondria  
991 were immediately resuspended in medium MAITE and subjected to a freeze-thaw step. Freeze-  
992 thaw mitochondria were mixed with the appropriate volume of MAITE + 2.5 mg/ml BSA at 37  
993 °C to reach 1 mL. Reaction was started by adding 100  $\mu$ M NADH and in some cases 1 mM  
994 Fe(CN)<sub>6</sub>, 1  $\mu$ M rotenone + 1  $\mu$ M antimycin A, 100  $\mu$ M succinate or 1 mM KCN was added to the

995 reaction mixture. Since the accessibility of CoQ-analogs could be differential across the different  
996 AOX-cell models (i.e. with or without supercomplexes), we performed DPI-sensitive  
997 NADH:Fe(CN)<sub>6</sub> activity (i.e. an activity for FMN in CI) which allowed us to quantify CI-content.  
998 NADH and Fe(CN)<sub>6</sub> levels were tracked by recording absorbance at 340 nm and 412 nm,  
999 respectively for 240 sec in a UV/VISJASCO spectrophotometer. Baseline NADH consumption  
1000 from the same sample was recorded after addition of 1 μM rotenone. Baseline Fe(CN)<sub>6</sub>  
1001 absorbance from the same sample was recorded after addition of 5 μM diphenyliodonium (DPI).

## 1002 **QUANTIFICATION AND STATISTICAL ANALYSIS**

1003 *Statistical analysis.* Unless specified, statistical analyses and graphics were produced with  
1004 GraphPad Prism 8 software. Data sets were compared by t-test, ANOVA or non-parametric  
1005 analysis when corresponded and with p-values adjusted for multiple test. Differences were  
1006 considered statistically significant at P values below 0.05. \**p-value* < 0.05; \*\* *p-value* < 0.01;  
1007 \*\*\* *p-value* < 0.001; \*\*\*\* *p-value* < 0.0001. All results are presented as mean ± SD or mean ±  
1008 SEM.

## 1009 **DATA AND CODE AVAILABILITY**

1010 Some of the datasets supporting the current study have not been deposited in a public repository  
1011 yet, but will be done when possible, meanwhile they are available from the corresponding author  
1012 on request.

1013

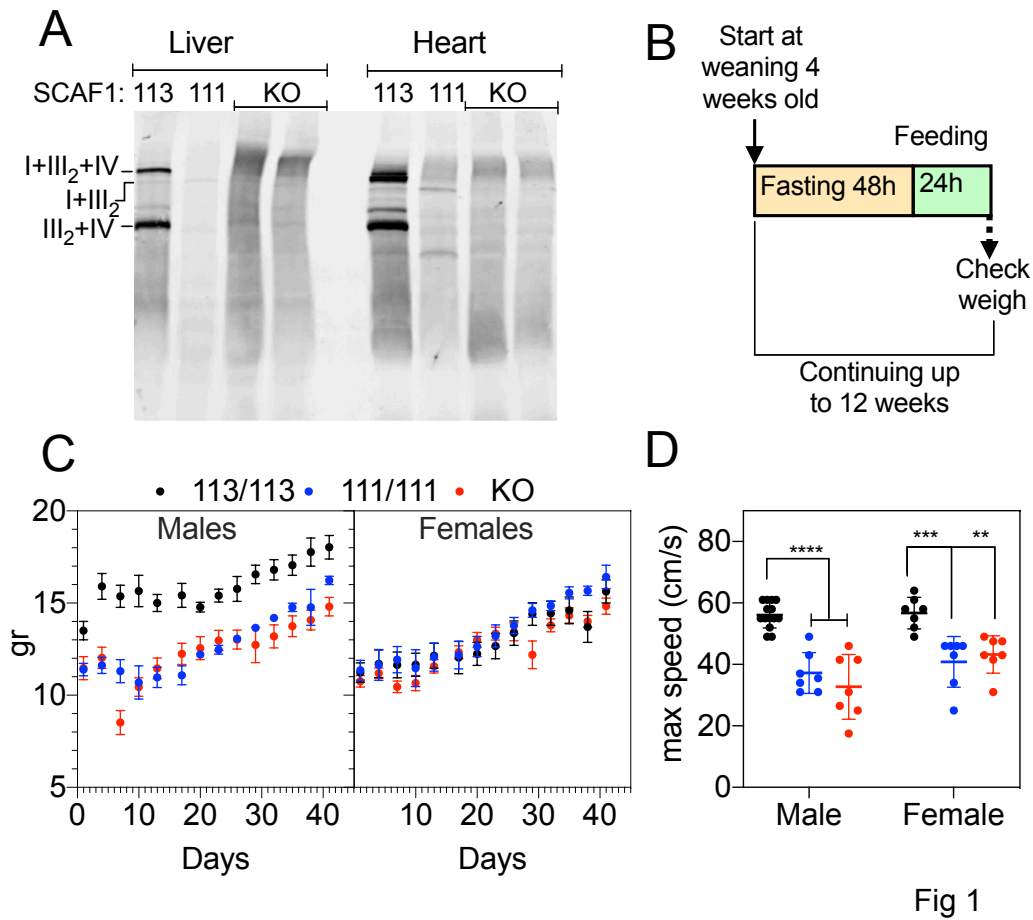

Fig 1

1014

1015 **Figure 1. SCAF1 deficiency induces a conspicuous phenotype in mice.**

1016

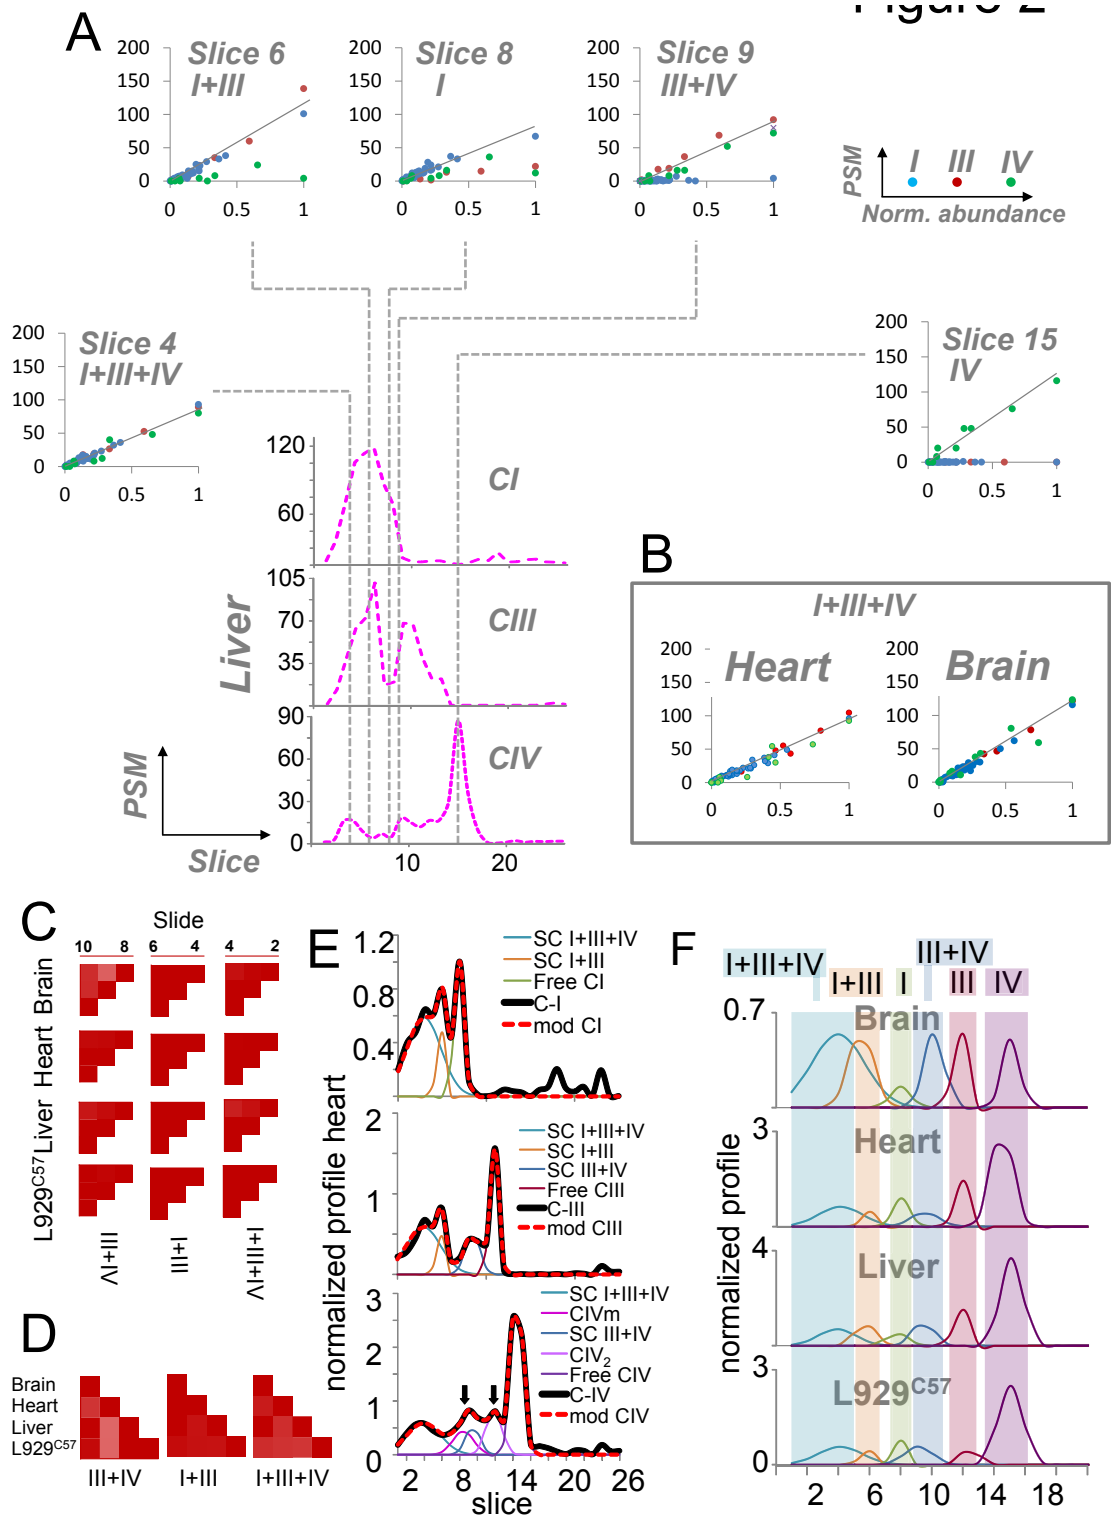

1017

1018 **Figure 2. Blue-DiS evidence of the formation of OXPHOS supercomplexes.**

1019

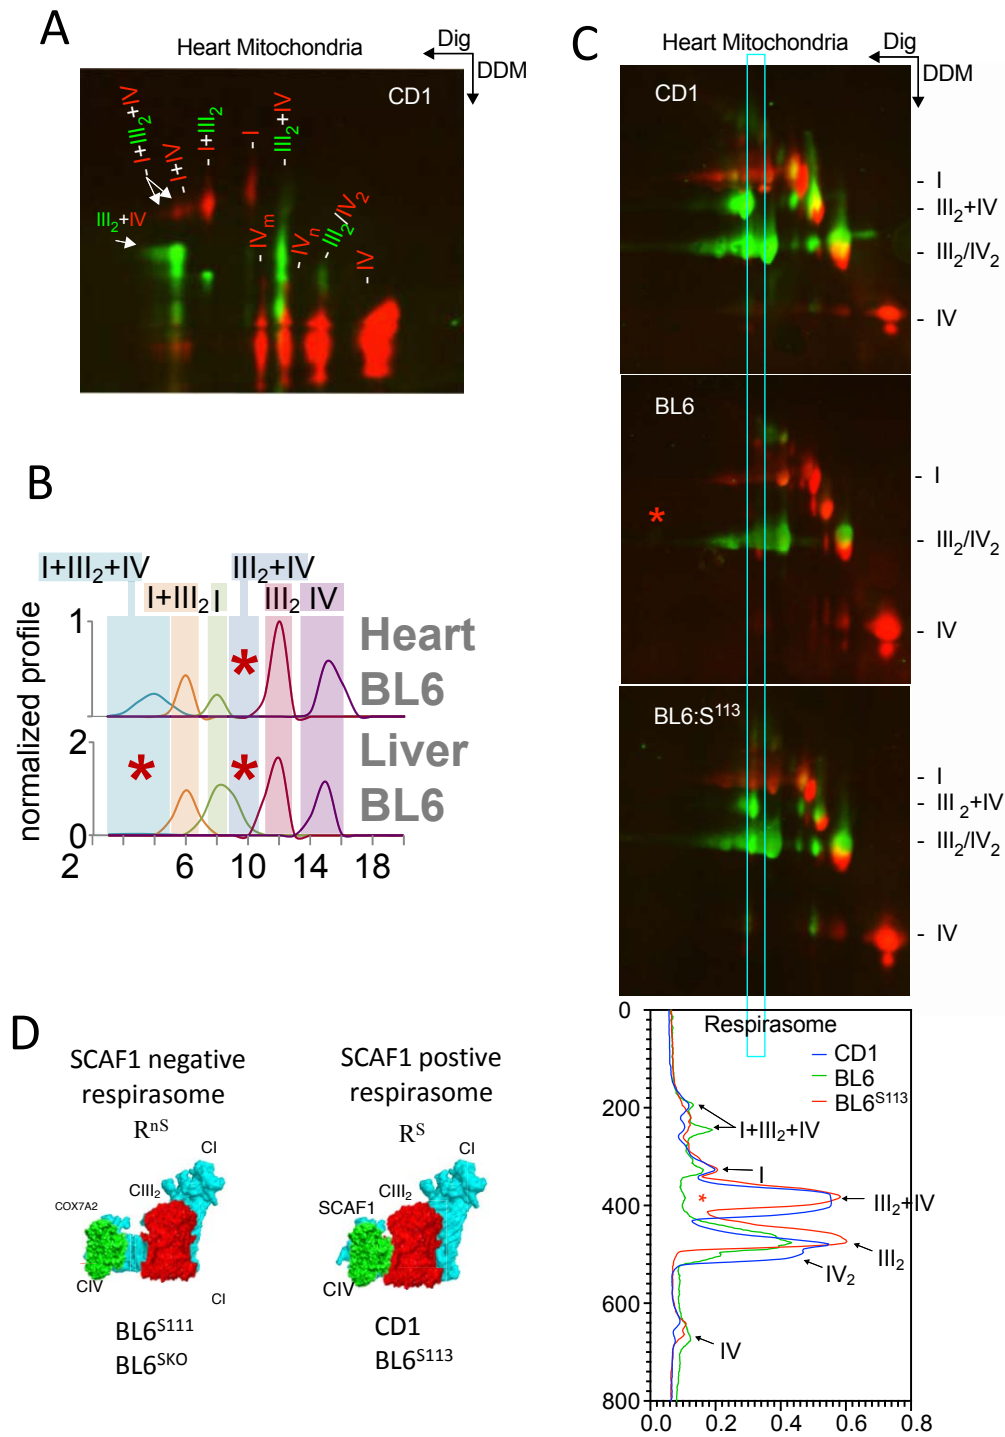

1020

1021 **Figure 3. Structural consequences of SCAF1-deficiency in the formation of SCs.**

1022

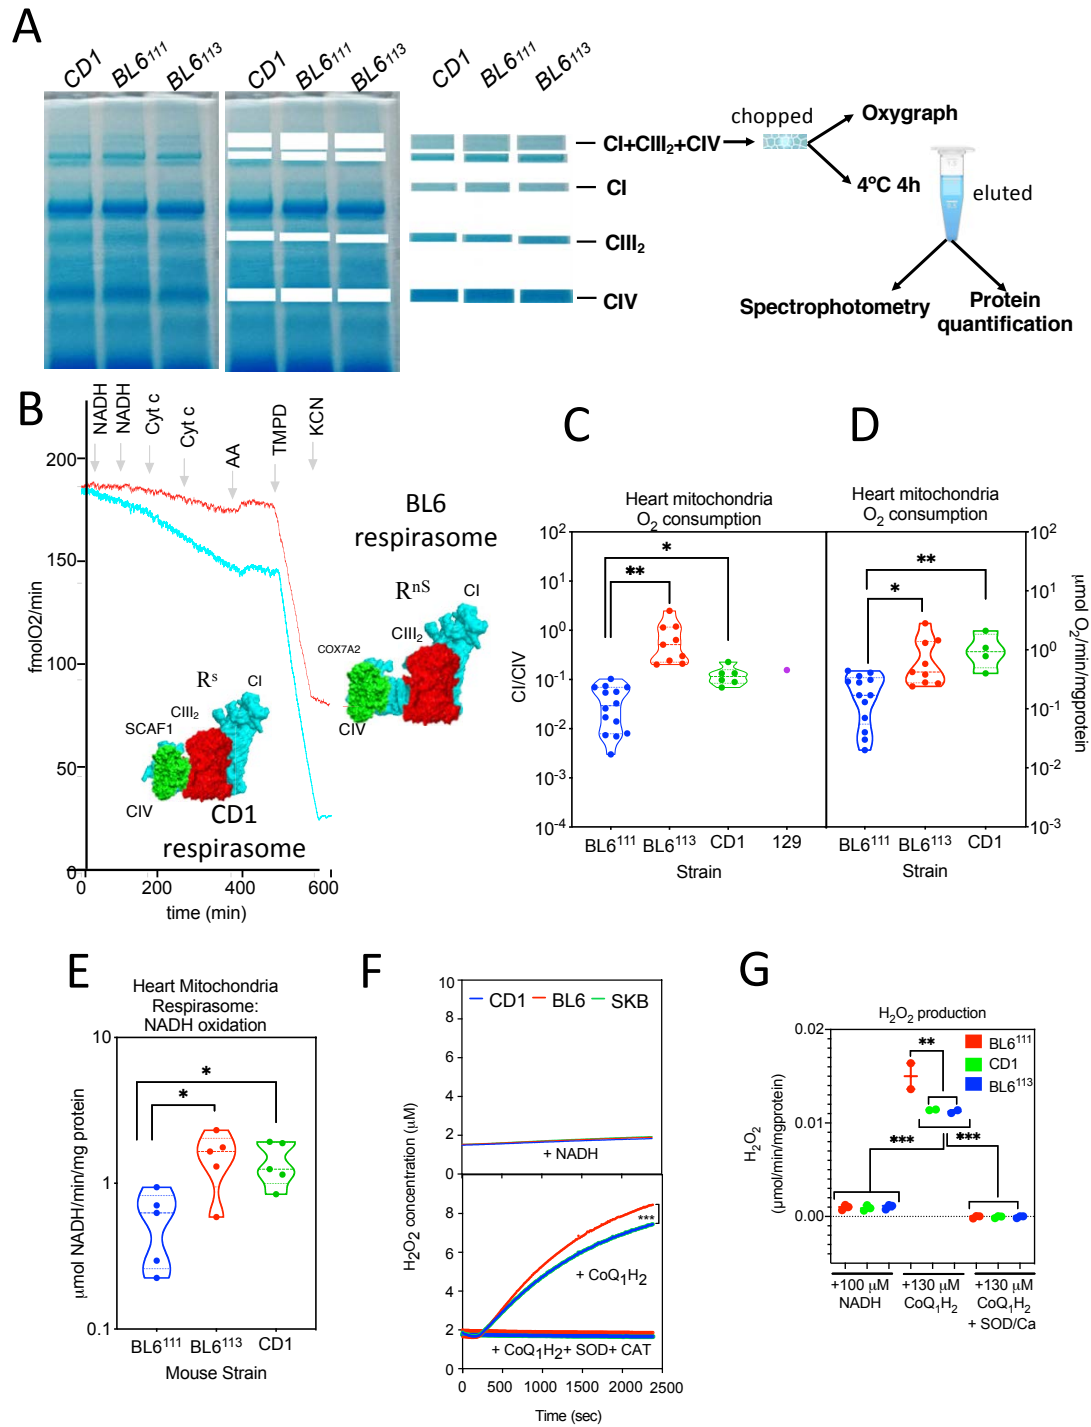

1023

1024 **Figure 4. Functional consequences of SCAF1-deficiency in the activity of the respirasome.**

1025



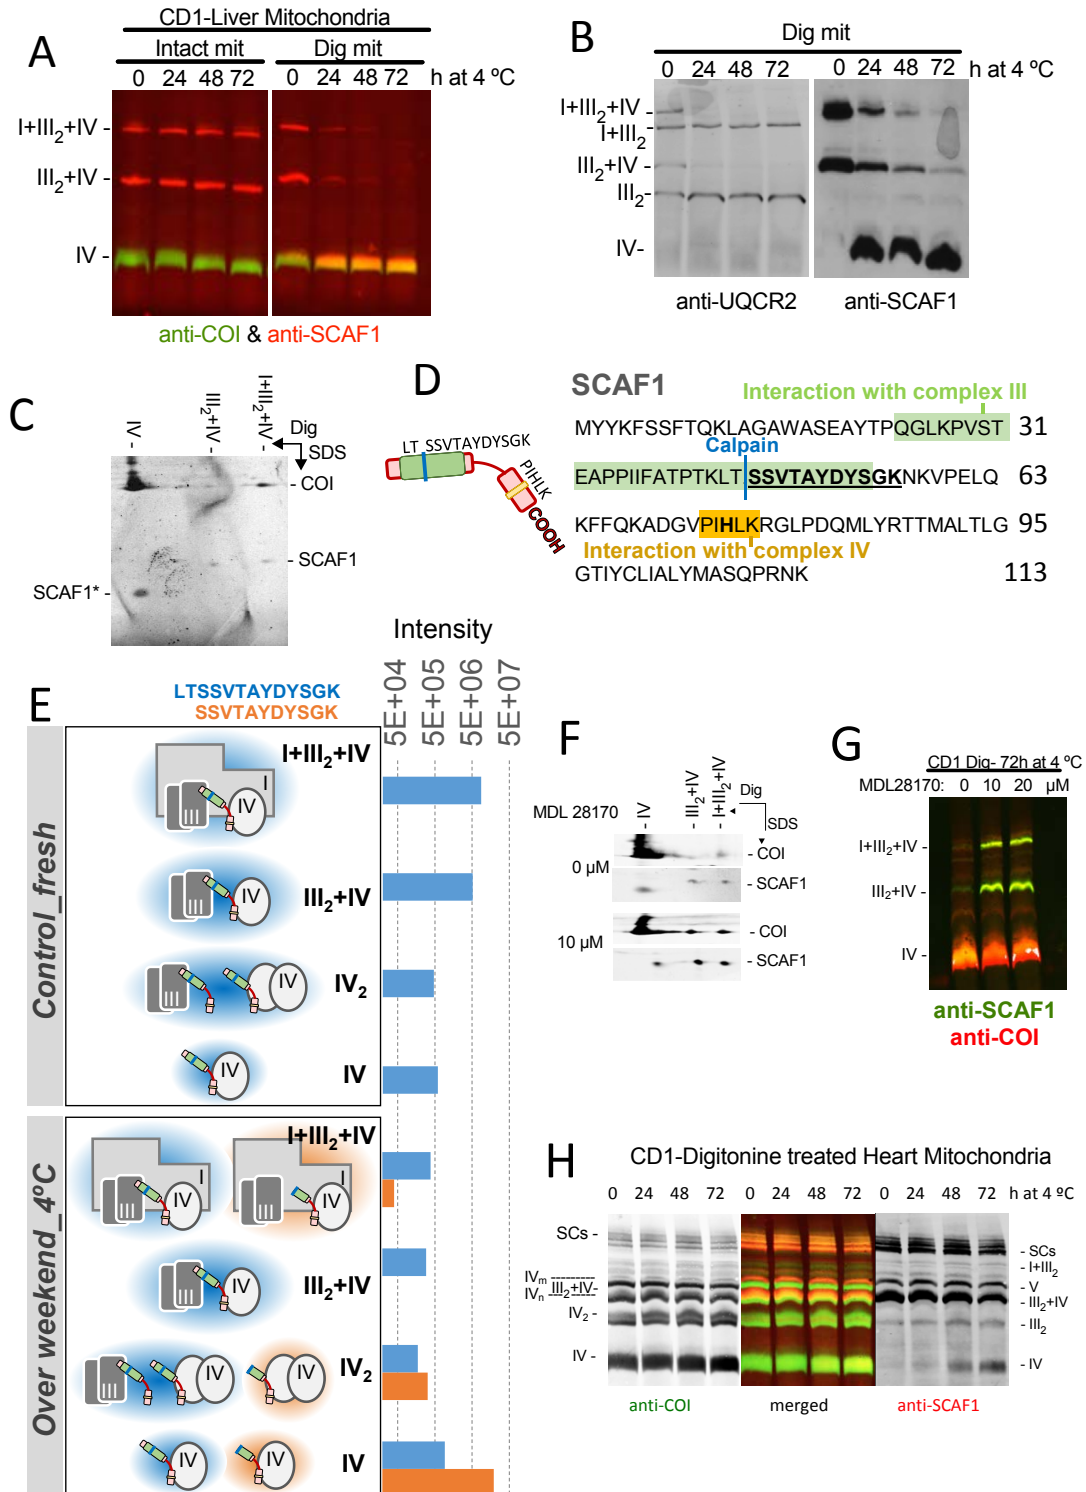

1026

1027 **Figure 5. Supercomplexes are unstable upon mitochondrial membrane disruption.**

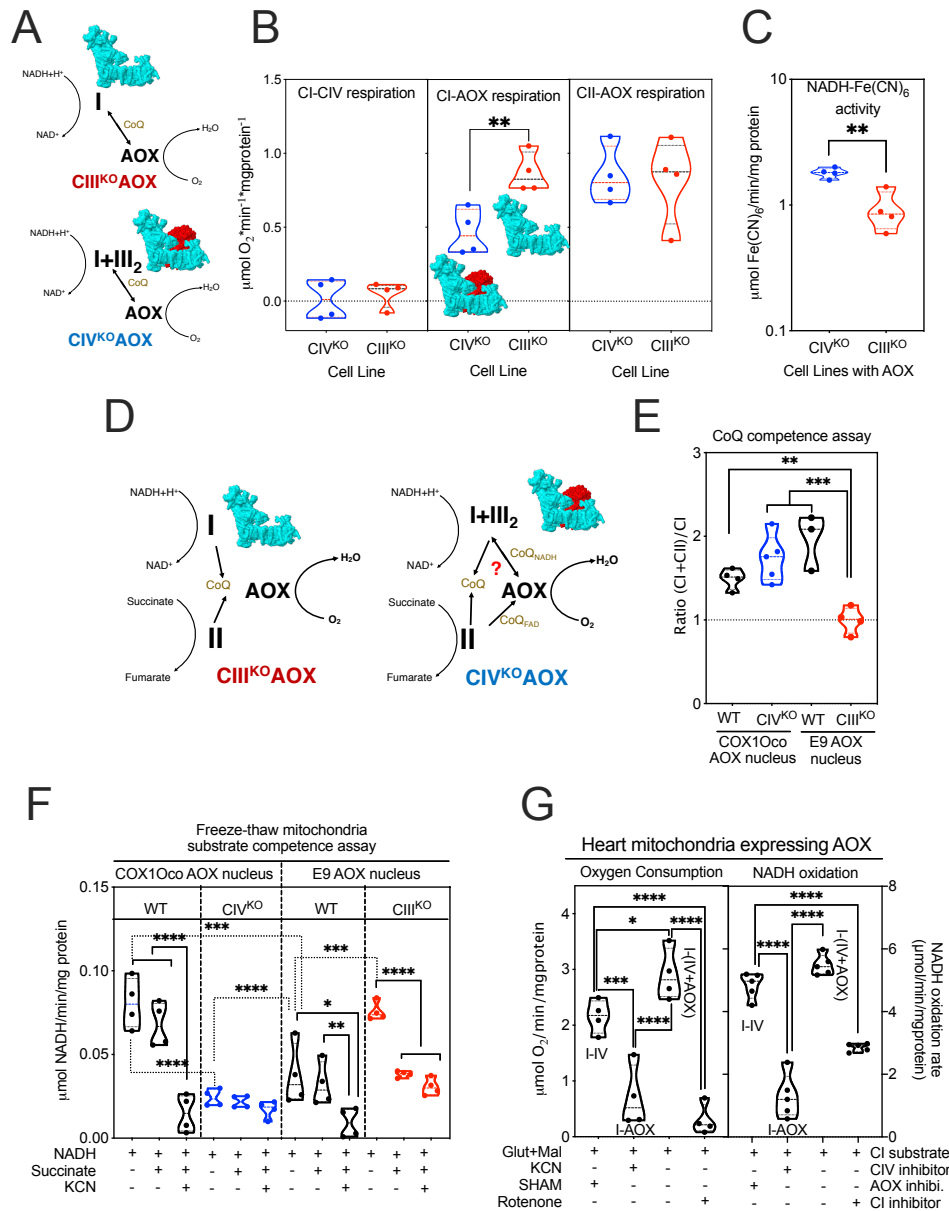

1028

1029 **Figure 6. The superassembly between complexes I and III modulates the activity of CI and**  
 1030 **functionally segments the CoQ pool.**
